# Supplementary material for: Preliminary test and Stein-type shrinkage ridge estimators in robust regression
Source: Springer Nature journal article supplement (doi:10.1007/s00362-017-0899-3), 2017-03-27
Supplement: 362_2017_899_MOESM1_ESM.pdf [file 362_2017_899_MOESM1_ESM.pdf]

# Supplemental Materials: Preliminary test and Stein-type shrinkage ridge estimators in robust regression

M. Norouzirad and M. Arashi\*

*Department of Statistics, School of Mathematical Sciences  
Shahrood University of Technology, Shahrood, Iran*

## ABSTRACT

This supplement contains the proofs of the theorems. It also provides more comparisons between the estimators and the simulation study and the real data application.

Key words: M-estimation; Multicollinearity; Non-sample information; Outliers; Ridge regression; Shrinkage methods.

The supplement is divided as follows. Section S1 contains the detailed proofs of theorems. In Section S2 we analyze the performance of proposed ridge Huberized estimators in detail. Sections S3 and S4 show omitted information on the simulation study and real data application, respectively. To prove the theorems, we need the ADB, ADQB, and ADR of M-estimators.

Under the foregoing regularity conditions and the local alternatives  $\{\mathcal{K}_{(n)}\}$ , the ADB, ADQB, and ADR of M-estimators are given by

$$(i) \quad \text{ADB}(\hat{\beta}_n^{(M)U}) = \mathbf{0}, \tag{S1}$$

$$\text{ADQB}(\hat{\beta}_n^{(M)U}) = 0, \tag{S2}$$

$$\text{ADR}(\hat{\beta}_n^{(M)U}; W) = \eta^2 \text{tr}(WC^{-1}), \tag{S3}$$

$$(ii) \quad \text{ADB}(\hat{\beta}_n^{(M)PT}) = -\boldsymbol{\delta} H_{p+2}(\chi_p^2(\alpha); \Delta^2), \quad \text{where } \Delta^2 = \eta^{-2} \boldsymbol{\delta}^T C \boldsymbol{\delta} \tag{S4}$$

$$\text{ADQB}(\hat{\beta}_n^{(M)PT}) = \Delta^2 \{H_{p+2}(\chi_p^2(\alpha); \Delta^2)\}^2, \tag{S5}$$

$$\text{ADR}(\hat{\beta}_n^{(M)PT}; W) = \eta^2 \text{tr}(WC^{-1})(1 - H_{p+2}(\chi_p^2(\alpha); \Delta^2)) + \boldsymbol{\delta}^T W \boldsymbol{\delta} h_2(\alpha; \Delta^2), \tag{S6}$$

$$(iii) \quad \text{ADB}(\hat{\beta}_n^{(M)S}) = -c \boldsymbol{\delta} E \left[ \chi_{p+2}^{-2}(\Delta^2) \right], \tag{S7}$$

$$\text{ADQB}(\hat{\beta}_n^{(M)S}) = c^2 \Delta^2 \left\{ E \left[ \chi_{p+2}^{-2}(\Delta^2) \right] \right\}^2, \tag{S8}$$

$$\text{ADR}(\hat{\beta}_n^{(M)S}; W) = \eta^2 \text{tr}(WC^{-1}) - c \eta^2 \text{tr}(WC^{-1}) h_3(\Delta^2) + c(c+4) \boldsymbol{\delta}^T W \boldsymbol{\delta} E \left[ \chi_{p+4}^{-4}(\Delta^2) \right], \tag{S9}$$

---

\*Corresponding author. Email: m.arashi\_stat@yahoo.com

$$(iv) \quad \text{ADB}(\hat{\beta}_n^{(M)S+}) = -\delta \left\{ cE \left[ \chi_{p+2}^{-2}(\Delta^2) \right] + E \left[ (1 - c\chi_{p+2}^{-2}(\Delta^2))I(\chi_{p+2}^2(\Delta^2) \leq c) \right] \right\}, \quad (S10)$$

$$\text{ADQB}(\hat{\beta}_n^{(M)S+}) = \Delta^2 \left\{ cE \left[ \chi_{p+2}^{-2}(\Delta^2) \right] - E \left[ (1 - c\chi_{p+2}^{-2}(\Delta^2))I(\chi_{p+2}^2(\Delta^2) \leq c) \right] \right\}^2 \quad (S11)$$

$$\begin{aligned} \text{ADR}(\hat{\beta}_n^{(M)S+}; W) &= \text{ADR}(\hat{\beta}_n^{(M)S}; W) + \delta^T W \delta h_4(\Delta^2) \\ &\quad - \eta^2 \text{tr}(WC^{-1})E \left[ (1 - c\chi_{p+2}^{-2}(\Delta^2))^2 I(\chi_{p+2}^2(\Delta^2) \leq c) \right], \end{aligned} \quad (S12)$$

## S1 Proof of The Theorems

**Proof of Theorem 3.1:** First, let us prove the following relation.

$$kC^{-1}(k) = I_p - R(k) \quad (S13)$$

Since we know that for all  $k > 0$ ,  $R(k) = (I_p + kC^{-1})^{-1}$ . Then,

$$\begin{aligned} &R^{-1}(k) = I_p + kC^{-1} \\ \iff &kC^{-1} = R^{-1}(k) - I_p \\ \implies &kR(k)C^{-1} = I_p - R(k) \\ \implies &k(I_p + kC^{-1})^{-1}C^{-1} = I_p - R(k) \\ \implies &k(C(I_p + kC^{-1})^{-1} = I_p - R(k) \\ \implies &k(C + kI_p)^{-1} = I_p - R(k) \\ \implies &-kC^{-1}(k) = R(k) - I_p \end{aligned}$$

Now, suppose that  $\hat{\beta}_n^{(M)*}(k)$  be an improved ridge M estimator. By the definition (23), the ADB of this estimator is given by

$$\begin{aligned} \text{ADB}(\hat{\beta}_n^{(M)*}(k)) &= \lim_{n \rightarrow \infty} E \left[ \sqrt{n}(\hat{\beta}_n^{(M)*}(k) - \beta) \right] \\ &= \lim_{n \rightarrow \infty} E \left[ \sqrt{n}(R_n(k)\hat{\beta}_n^{(M)*} - \beta) \right] \\ &= \lim_{n \rightarrow \infty} E \left[ \sqrt{n}(R_n(k)\hat{\beta}_n^{(M)*} - R_n(k)\beta + R_n(k)\beta - \beta) \right] \\ &= \lim_{n \rightarrow \infty} E \left[ R_n(k)\sqrt{n}(\hat{\beta}_n^{(M)*} - \beta) \right] + \lim_{n \rightarrow \infty} E \left[ (R_n(k) - I_p)\sqrt{n}\beta \right] \\ &= R(k)\text{ADB}(\hat{\beta}_n^{(M)*}) - kC^{-1}(k)\delta \end{aligned}$$

The last line is resulted by Slutsky's theorem and Eq. (S13). We leave it to reader to substituting one of Eqs. (S1),(S4),(S7), and (S10) in the above expression and obtain the ADB of the ridge-type estimators.

The ADQB of  $\hat{\beta}_n^{(M)*}(k)$  follows easily from the Eq. (24) as

$$\begin{aligned} \text{ADQB}(\hat{\beta}_n^{(M)*}(k)) &= R(k)^T [\text{ADB}(\hat{\beta}_n^{(M)*})]^T R(k) \text{ADB}(\hat{\beta}_n^{(M)*}) + k^2 \delta^T C^{-2}(k) \delta \\ &\quad - 2k \delta^T C^{-1}(k) R(k) \text{ADB}(\hat{\beta}_n^{(M)*}). \end{aligned} \quad (S14)$$

By Eqs. (S1),(S4),(S7), and (S10) and substituting them in (S14), the proof finishes.

**Proof of Theorem 3.2:** If  $\hat{\beta}_n^{(M)*}(k)$  be an improved ridge M estimator, its ADR is

$$\begin{aligned}
\text{ADR}(\hat{\beta}_n^{(M)*}; W) &= \lim_{n \rightarrow \infty} E \left[ n(\hat{\beta}_n^{(M)*}(k) - \beta)^T W (\hat{\beta}_n^{(M)*}(k) - \beta) \right] \\
&= \lim_{n \rightarrow \infty} E \left[ n(R_n(k)\hat{\beta}_n^{(M)*} - \beta)^T W (R_n(k)\hat{\beta}_n^{(M)*} - \beta) \right] \\
&= \lim_{n \rightarrow \infty} E \left[ n(R_n(k)\hat{\beta}_n^{(M)*} - R_n(k)\beta + R_n(k)\beta - \beta)^T W (R_n(k)\hat{\beta}_n^{(M)*} \right. \\
&\quad \left. - R_n(k)\beta + R_n(k)\beta - \beta) \right] \\
&= \lim_{n \rightarrow \infty} E \left[ n(\hat{\beta}_n^{(M)*} - \beta)^T [R_n(k)]^T W R_n(k) (\hat{\beta}_n^{(M)*} - \beta) \right] \\
&\quad + \lim_{n \rightarrow \infty} E \left[ n\beta^T (R_n(k) - I_p)^T W R_n(k) (\hat{\beta}_n^{(M)*} - \beta) \right] \\
&\quad + \lim_{n \rightarrow \infty} E \left[ n(\hat{\beta}_n^{(M)*} - \beta)^T [R_n(k)]^T W (R_n(k) - I_p) \beta \right] \\
&\quad + \lim_{n \rightarrow \infty} E \left[ n\beta^T (R_n(k) - I_p)^T W (R_n(k) - I_p) \beta \right]
\end{aligned}$$

By the definition of asymptotic distribution bias and risk and also, Eq. (S13), we have

$$\begin{aligned}
\text{ADR}(\hat{\beta}_n^{(M)*}; W) &= \text{ADR}(\hat{\beta}_n^{(M)*}; W^*) - k \left[ \delta^T C^{-1}(k) W R(k) \text{ADB}(\hat{\beta}_n^{(M)*}) \right. \\
&\quad \left. + [\text{ADB}(\hat{\beta}_n^{(M)*})]^T [R_n(k)]^T W C^{-1}(k) \delta \right]
\end{aligned} \tag{S15}$$

We leave it to the reader to obtain the expressions presented in Theorem 3.2 by using one of Eqs. (S3),(S6),(S9), and (S12) in the Eq. (S15).

## S2 Comparison between estimators

**Proof of Theorem 4.1 (Comparison between PRRME and PRME):**

*Case 1. Null hypothesis,  $\mathcal{H}_0 : \beta = \mathbf{0}$ :* In this case, the risk difference of two estimators is given by

$$\begin{aligned}
\text{ADR}(\hat{\beta}_n^{(M)S+}) - \text{ADR}(\hat{\beta}_n^{(M)S+}(k)) &= \eta^2 \text{tr} (C^{-1} - [R(k)]^T C^{-1} R(k)) \\
&\quad \times \left( 1 - ch_3(0) + E \left[ (1 - c\chi_{p+2}^{-2}(0))^2 I(\chi_{p+2}^2(0) \leq c) \right] \right)
\end{aligned}$$

The r.h.s of this expression is nonnegative when  $1 - ch_3(0) + E \left[ (1 - c\chi_{p+2}^{-2}(0))^2 I(\chi_{p+2}^2(0) \leq c) \right] \geq 0$ .

On the other hand, we have

$$\begin{aligned}
&ch_3(0) - 1 \leq E \left[ (1 - c\chi_{p+2}^{-2}(0))^2 I(\chi_{p+2}^2(0) \leq c) \right] \leq E \left[ (1 - c\chi_{p+2}^{-2}(0))^2 \right] \\
\implies &2cE \left[ \chi_{p+2}^{-2}(0) \right] - c^2 E \left[ \chi_{p+2}^{-4}(0) \right] - 1 \leq 1 - 2cE \left[ \chi_{p+2}^{-2}(0) \right] + c^2 E \left[ \chi_{p+2}^{-4}(0) \right] \\
\implies &2 \left( c^2 E \left[ \chi_{p+2}^{-4}(0) \right] - 2cE \left[ \chi_{p+2}^{-2}(0) \right] + 1 \right) \geq 0 \\
\implies &2 \left( \frac{c^2}{p(p-2)} - \frac{2c}{p} + 1 \right) \geq 0 \\
\implies &2 \left( \frac{c^2 - 2c(p-2) + p(p-2)}{p(p-2)} \right) \geq 0 \quad \implies c^2 - 2c(p-2) + p(p-2) \geq 0
\end{aligned}$$

The last line always true for  $p \geq 3$ . Thus, with this condition under  $\mathcal{H}_o$ , PRRME uniformly dominates PRME.

*Case 2. Alternative hypothesis,  $\mathcal{H}_A : \beta \neq \mathbf{0}$ :* We consider the risk difference between PRRME and PRME estimators as

$$\begin{aligned} \text{ADR}(\hat{\beta}_n^{(M)S+}; I_p) - \text{ADR}(\hat{\beta}_n^{(M)S+}(k); I_p) &= \text{ADR}(\hat{\beta}_n^{(M)S}; I_p) - \text{ADR}(\hat{\beta}_n^{(M)S}(k); I_p) \\ &+ \eta^2 \text{tr}(C^{-1} - [R(k)]^T C^{-1} R(k)) E \left[ (1 - c\chi_{p+2}^{-2}(\Delta^2))^2 I(\chi_{p+2}^2(\Delta^2) \leq c) \right] \\ &+ \delta^T (I_p - [R(k)]^T R(k)) \delta Q(\Delta^2) - k \delta^T (C^{-1}(k) R(k) + [R(k)]^T C^{-1}(k)) \delta \\ &\times E \left[ (1 - c\chi_{p+2}^{-2}(\Delta^2)) I(\chi_{p+2}^2(\Delta^2) \leq c) \right] \end{aligned} \quad (\text{S16})$$

Substituting Eq. (S48) in Eq. (S16) results in the below equation.

$$\begin{aligned} &\eta^2 \text{tr} \left( C^{-1} - [R(k)]^T C^{-1} R(k) \right) (1 - c h_3(\Delta^2) + E \left[ (1 - c\chi_{p+2}^{-2}(\Delta^2))^2 I(\chi_{p+2}^2(\Delta^2) \leq c) \right]) \\ &+ c(c+4) \delta^T (I_p - [R(k)]^T R(k)) \delta \left( E \left[ \chi_{p+4}^{-4}(\Delta^2) \right] + h_4(\Delta^2) \right) - k^2 \delta^T C^{-2}(k) \delta \\ &- k \delta^T [C^{-1}(k) R(k) + [R(k)]^T C^{-1}(k)] \delta \left( E \left[ \chi_{p+2}^{-2}(\Delta^2) \right] + E \left[ (1 - c\chi_{p+2}^{-2}(\Delta^2)) I(\chi_{p+2}^2(\Delta^2) \leq c) \right] \right) \end{aligned} \quad (\text{S17})$$

Eq. (S17) will be nonnegative if

$$\begin{aligned} &\delta^T [k^2 C^{-2}(k) + k [C^{-1}(k) R(k) + [R(k)]^T C^{-1}(k)] f_1(\Delta^2) - (I_p - [R(k)]^T R(k)) f_2(\Delta^2)] \delta \\ &\leq \eta^2 \text{tr} \left( C^{-1} - [R(k)]^T C^{-1} R(k) \right) (1 - c h_3(\Delta^2) + E \left[ (1 - c\chi_{p+2}^{-2}(\Delta^2))^2 I(\chi_{p+2}^2(\Delta^2) \leq c) \right]) \end{aligned}$$

where

$$\begin{aligned} f_1(\Delta^2) &= E \left[ \chi_{p+2}^{-2}(\Delta^2) \right] + E \left[ (1 - c\chi_{p+2}^{-2}(\Delta^2)) I(\chi_{p+2}^2(\Delta^2) \leq c) \right] \\ f_2(\Delta^2) &= c(c+4) \left( E \left[ \chi_{p+4}^{-4}(\Delta^2) \right] + 2E \left[ (1 - c\chi_{p+2}^{-2}(\Delta^2)) I(\chi_{p+2}^2(\Delta^2) \leq c) \right] \right. \\ &\quad \left. - E \left[ (1 - c\chi_{p+4}^{-2}(\Delta^2))^2 I(\chi_{p+4}^2(\Delta^2) \leq c) \right] \right) \end{aligned}$$

Using Courant's theorem, PRRME dominates PRME when

$$\Delta^2 \leq \frac{\text{tr}(C^{-1} - [R(k)]^T C^{-1} R(k)) (1 - c h_3(\Delta^2) + E \left[ (1 - c\chi_{p+2}^{-2}(\Delta^2))^2 I(\chi_{p+2}^2(\Delta^2) \leq c) \right])}{Ch_{1,\min}} = \Delta_1^2(k).$$

and PRME dominates PRRME when

$$\Delta^2 \geq \frac{\text{tr}(C^{-1} - [R(k)]^T C^{-1} R(k)) (1 - c h_3(\Delta^2) + E \left[ (1 - c\chi_{p+2}^{-2}(\Delta^2))^2 I(\chi_{p+2}^2(\Delta^2) \leq c) \right])}{Ch_{1,\max}} = \Delta_1'^2(k).$$

where

$$\begin{aligned}
Ch_{1,\min} &= Ch_{\min} \left( \left( k^2 C^{-2}(k) + k [C^{-1}(k)R(k) + [R(k)]^T C^{-1}(k)] f_1(\Delta^2) \right. \right. \\
&\quad \left. \left. - (I_p - [R(k)]^T R(k)) f_2(\Delta^2) \right) C^{-1} \right) \\
Ch_{1,\max} &= Ch_{\max} \left( \left( k^2 C^{-2}(k) + k [C^{-1}(k)R(k) + [R(k)]^T C^{-1}(k)] f_1(\Delta^2) \right. \right. \\
&\quad \left. \left. - (I_p - [R(k)]^T R(k)) f_2(\Delta^2) \right) C^{-1} \right)
\end{aligned}$$

To obtain a condition on  $k$ , we consider the risk function of PRRME in terms of eigenvalues as

$$\begin{aligned}
\text{ADR}(\hat{\beta}_n^{(M)S+}(k); I_p) &= \text{ADR}(\hat{\beta}_n^{(M)S}(k); I_p) \\
&\quad - \sum_{i=1}^p \frac{\lambda_i}{(\lambda_i + k)^2} \left\{ \eta^2 E \left[ (1 - c\chi_{p+2}^{-2}(\Delta^2))^2 I(\chi_{p+2}^2(\Delta^2) \leq c) \right] \right. \\
&\quad \left. - \lambda_i \theta_i^2 h_4(\Delta^2) - 2k\theta_i^2 E \left[ (1 - c\chi_{p+2}^{-2}(\Delta^2)) I(\chi_{p+2}^2(\Delta^2) \leq c) \right] \right\} \quad (\text{S18})
\end{aligned}$$

where  $\text{ADR}(\hat{\beta}_n^{(M)S}(k); I_p)$  is given in

$$\begin{aligned}
\text{ADR}(\hat{\beta}_n^{(M)S}(k); I_p) &= \sum_{i=1}^p \frac{1}{(\lambda_i + k)^2} \left\{ \lambda_i \eta^2 (1 - cX(\Delta^2)) + c(c+4)\lambda_i^2 \theta_i^2 E \left[ \chi_{p+4}^{-4}(\Delta^2) \right] \right. \\
&\quad \left. + k^2 \theta_i^2 + 2ck\lambda_i \theta_i^2 E \left[ \chi_{p+2}^{-2}(\Delta^2) \right] \right\}. \quad (\text{S19})
\end{aligned}$$

Differentiating (S18) w.r.t.  $k$ , we obtain

$$\begin{aligned}
\frac{\partial \text{ADR}(\hat{\beta}_n^{(M)S+}(k); I_p)}{\partial k} &= \frac{\partial \text{ADR}(\hat{\beta}_n^{(M)S}(k); I_p)}{\partial k} \\
&\quad + 2 \sum_{i=1}^p \frac{\lambda_i}{(\lambda_i + k)^3} \left\{ \eta^2 E \left[ (1 - c\chi_{p+2}^{-2}(\Delta^2))^2 I(\chi_{p+2}^2(\Delta^2) \leq c) \right] \right. \\
&\quad \left. - \lambda_i \theta_i^2 h_4(\Delta^2) - k\theta_i^2 E \left[ (1 - c\chi_{p+2}^{-2}(\Delta^2)) I(\chi_{p+2}^2(\Delta^2) \leq c) \right] \right. \\
&\quad \left. + \lambda_i \theta_i^2 E \left[ (1 - c\chi_{p+2}^{-2}(\Delta^2)) I(\chi_{p+2}^2(\Delta^2) \leq c) \right] \right\} \quad (\text{S20})
\end{aligned}$$

where

$$\begin{aligned}
\frac{\partial \text{ADR}(\hat{\beta}_n^{(M)S}(k); I_p)}{\partial k} &= -2 \sum_{i=1}^p \frac{\lambda_i}{(\lambda_i + k)^3} \left\{ \eta^2 (1 - cX(\Delta^2)) + c(c+4)\lambda_i \theta_i^2 E \left[ \chi_{p+4}^{-4}(\Delta^2) \right] \right. \\
&\quad \left. - c\lambda_i \theta_i^2 E \left[ \chi_{p+2}^{-2}(\Delta^2) \right] - k\theta_i^2 \left( 1 - cE \left[ \chi_{p+2}^{-2}(\Delta^2) \right] \right) \right\}. \quad (\text{S21})
\end{aligned}$$

We define

$$k_1(\Delta^2) = \frac{f_3(\Delta^2)}{\max_{1 \leq i \leq p} \left\{ \theta_i^2 \left( 1 - cE \left[ \chi_{p+2}^{-2}(\Delta^2) \right] - E \left[ (1 - c\chi_{p+2}^{-2}(\Delta^2)) I(\chi_{p+2}^2(\Delta^2) \leq c) \right] \right) \right\}}, \quad (\text{S22})$$

where

$$f_3(\Delta^2) = \min_{1 \leq i \leq p} \left\{ \eta^2 \left( 1 - ch_3(\Delta^2) - E \left[ (1 - c\chi_{p+2}^{-2}(\Delta^2))^2 I(\chi_{p+2}^2(\Delta^2) \leq c) \right] \right) \right. \\ \left. + \lambda_i \theta_i^2 \left( c(c+4)E \left[ \chi_{p+4}^{-4}(\Delta^2) \right] - cE \left[ \chi_{p+2}^{-2}(\Delta^2) \right] \right) \right. \\ \left. - E \left[ (1 - c\chi_{p+2}^{-2}(\Delta^2)) I(\chi_{p+2}^2(\Delta^2) \leq c) \right] \right\}.$$

So, for each positive  $k$  with  $k \leq k_1(\Delta^2)$ , PRRME has a risk value less than that of PRME.

**Proof of Theorem 4.2 (Comparison between PRRME and URME):**

*Case 1. Null hypothesis,  $\mathcal{H}_0 : \beta = \mathbf{0}$ :* The risk difference between two estimators is

$$\text{ADR}(\hat{\beta}_n^{(M)U}(k); I_p) - \text{ADR}(\hat{\beta}_n^{(M)S+}(k); I_p) = \\ \eta^2 \text{tr} \left( ch_3(0) + E \left[ (1 - c\chi_{p+2}^{-2}(0))^2 I(\chi_{p+2}^2(0) \leq c) \right] \right) \geq 0 \quad (\text{S23})$$

since

$$-ch_3(0) \leq E \left[ (1 - c\chi_{p+2}^{-2}(0))^2 I(\chi_{p+2}^2(0) \leq c) \right] \leq E \left[ (1 - c\chi_{p+2}^{-2}(0))^2 \right].$$

*Case 2. Alternative hypothesis,  $\mathcal{H}_A : \beta \neq \mathbf{0}$ :* The risk difference is

$$\text{ADR}(\hat{\beta}_n^{(M)U}(k); I_p) - \text{ADR}(\hat{\beta}_n^{(M)S+}(k); I_p) = \text{ADR}(\hat{\beta}_n^{(M)U}(k); I_p) - \text{ADR}(\hat{\beta}_n^{(M)S}(k); I_p) \\ + \eta^2 \text{tr} \left( [R(k)]^T C^{-1} R(k) \right) E \left[ (1 - c\chi_{p+2}^{-2}(\Delta^2))^2 I(\chi_{p+2}^2(\Delta^2) \leq c) \right] \\ - \delta^T [R(k)]^T R(k) \delta h_4(\Delta^2) - k \left( \delta^T C^{-1}(k) R(k) \delta + \delta^T [R(k)]^T C^{-1}(k) \delta \right) \\ \times E \left[ (1 - c\chi_{p+2}^{-2}(\Delta^2)) I(\chi_{p+2}^2(\Delta^2) \leq c) \right] \\ = \eta^2 \text{tr} \left( [R(k)]^T C^{-1} R(k) \right) f_4(\Delta^2) - \delta^T [R(k)]^T R(k) \delta f_5(\Delta^2) \\ - k \left( \delta^T C^{-1}(k) R(k) \delta + \delta^T [R(k)]^T C^{-1}(k) \delta \right) f_6(\Delta^2) \quad (\text{S24})$$

where

$$f_4(\Delta^2) = ch_3(\Delta^2) + E \left[ (1 - c\chi_{p+2}^{-2}(\Delta^2))^2 I(\chi_{p+2}^2(\Delta^2) \leq c) \right] \\ f_5(\Delta^2) = c(c+4)E \left[ \chi_{p+4}^{-4}(\Delta^2) \right] + h_4(\Delta^2) \\ f_6(\Delta^2) = cE \left[ \chi_{p+2}^{-2}(\Delta^2) \right] + E \left[ (1 - c\chi_{p+2}^{-2}(\Delta^2)) I(\chi_{p+2}^2(\Delta^2) \leq c) \right].$$

The r.h.s of (S24) is non-negative when

$$\delta^T \left[ [R(k)]^T R(k) f_5(\Delta^2) + k(C^{-1}(k)R(k) + [R(k)]^T C^{-1}(k)) f_6(\Delta^2) \right] \delta \leq \\ \eta^2 \text{tr}([R(k)]^T C^{-1} R(k)) f_4(\Delta^2); \quad (\text{S25})$$

Using Courant's theorem, PRRME dominates URME when

$$\Delta^2 \leq \frac{\text{tr}([R(k)]^T C^{-1} R(k)) f_4(\Delta^2)}{Ch_{\min} \left( ([R(k)]^T R(k) f_5(\Delta^2) + k(C^{-1}(k)R(k) + [R(k)]^T C^{-1}(k)) f_6(\Delta^2)) C^{-1} \right)} = \Delta_2^2(k),$$

and URME is superior to PRRME when

$$\Delta^2 \geq \frac{\text{tr}([R(k)]^T C^{-1} R(k)) f_4(\Delta^2)}{Ch_{\max} \left( ([R(k)]^T R(k) f_5(\Delta^2) + k(C^{-1}(k)R(k) + [R(k)]^T C^{-1}(k)) f_6(\Delta^2)) C^{-1} \right)} = \Delta_2'^2(k).$$

To obtain a condition on  $k$ , we consider the risk difference between PRRME and URME in terms of eigenvalues as

$$\begin{aligned} \text{ADR}(\hat{\beta}_n^{(M)U}(k); I_p) - \text{ADR}(\hat{\beta}_n^{(M)S+}(k); I_p) &= \text{ADR}(\hat{\beta}_n^{(M)U}(k); I_p) - \text{ADR}(\hat{\beta}_n^{(M)S}(k); I_p) \\ &\quad - \sum_{i=1}^p \frac{\lambda_i}{(\lambda_i + k)^2} \left\{ \eta^2 E \left[ (1 - c\chi_{p+2}^{-2}(\Delta^2))^2 I(\chi_{p+2}^2(\Delta^2) \leq c) \right] \right. \\ &\quad \left. - \lambda_i \theta_i^2 h_4(\Delta^2) - 2k\theta_i^2 E \left[ (1 - c\chi_{p+2}^{-2}(\Delta^2)) I(\chi_{p+2}^2(\Delta^2) \leq c) \right] \right\} \\ &= \sum_{i=1}^p \frac{\lambda_i}{(\lambda_i + k)^2} \left\{ \eta^2 \left( c h_3(\Delta^2) - E \left[ (1 - c\chi_{p+2}^{-2}(\Delta^2))^2 I(\chi_{p+2}^2(\Delta^2) \leq c) \right] \right) \right. \\ &\quad - \lambda_i \theta_i^2 \left( c(c+4) E \left[ \chi_{p+4}^{-4}(\Delta^2) \right] - h_4(\Delta^2) \right) \\ &\quad \left. - 2k\theta_i^2 \left( c E \left[ \chi_{p+2}^{-2}(\Delta^2) \right] - E \left[ (1 - c\chi_{p+2}^{-2}(\Delta^2))^2 I(\chi_{p+2}^2(\Delta^2) \leq c) \right] \right) \right\}. \end{aligned}$$

The r.h.s. of the above expression will be non-negative if

$$k \leq \frac{f_7(\Delta^2)}{\max_{1 \leq i \leq p} \left\{ \theta_i^2 \left( c E \left[ \chi_{p+2}^{-2}(\Delta^2) \right] - E \left[ (1 - c\chi_{p+2}^{-2}(\Delta^2))^2 I(\chi_{p+2}^2(\Delta^2) \leq c) \right] \right) \right\}} = k_2(\Delta^2) \quad (\text{S26})$$

where

$$f_7(\Delta^2) = \min_{1 \leq i \leq p} \left\{ \eta^2 \left( c h_3(\Delta^2) - E \left[ (1 - c\chi_{p+2}^{-2}(\Delta^2))^2 I(\chi_{p+2}^2(\Delta^2) \leq c) \right] \right) \right. \\ \left. - \lambda_i \theta_i^2 \left( c(c+4) E \left[ \chi_{p+4}^{-4}(\Delta^2) \right] - h_4(\Delta^2) \right) \right\}.$$

Thus, for each positive  $k$  with  $k < k_2(\Delta^2)$ , PRRME has a risk less than URME.

**Proof of Theorem 4.3 (Comparison between PRRME and PTRME):**

*Case 1. Null hypothesis,  $\mathcal{H}_0 : \beta = \mathbf{0}$ :* The risk difference is

$$\eta^2 \text{tr}([R(k)]^T C^{-1} R(k)) \left( c h_3(0) - H_{p+2}(\chi_p^2(\alpha); 0) + E \left[ (1 - c\chi_{p+2}^2(0))^2 I(\chi_{p+2}^2(0) \leq c) \right] \right) \geq 0,$$

for all  $\alpha$  satisfy the condition

$$\left\{ \alpha : \chi_p^2(\alpha) \leq H_{p+2}^{-1} \left( \frac{2c(p-2) - c^2}{p(p-2)} + E \left[ (1 - c\chi_{p+2}^{-2}(0))^2 I(\chi_{p+2}^2(0) \leq c) \right] \right) \right\}. \quad (\text{S27})$$

Thus, the asymptotic distribution risk of PRRME is smaller than that of PTRME when the critical value  $\chi_p^2(\alpha)$  satisfies the relation in (S27). However, the PTRME dominates PRRME when the critical value  $\chi_p^2(\alpha)$  satisfies the opposite relation to (S27).

Case 2. Alternative hypothesis,  $\mathcal{H}_A : \beta \neq \mathbf{0}$ : The risk differences is

$$\begin{aligned}
& \text{ADR}(\hat{\beta}_n^{(M)\text{PT}}(k); I_p) - \text{ADR}(\hat{\beta}_n^{(M)\text{S}^+}(k); I_p) = \text{ADR}(\hat{\beta}_n^{(M)\text{PT}}(k); I_p) - \text{ADR}(\hat{\beta}_n^{(M)\text{S}}(k); I_p) \\
& \quad + \eta^2 \text{tr}([R(k)]^T C^{-1} R(k)) E[(1 - c\chi_{p+2}^2(\Delta^2))^2 I(\chi_{p+2}^2(\Delta^2) \leq c)] \\
& \quad - \delta^T [R(k)]^T R(k) \delta h_4(\Delta^2) - k \delta^T (C^{-1}(k) R(k) + [R(k)]^T C^{-1}(k)) \delta \\
& \quad \times E[(1 - c\chi_{p+2}^{-2}(\Delta^2)) I(\chi_{p+2}^2(\Delta^2) \leq c)] \\
& = \eta^2 \text{tr}([R(k)]^T C^{-1} R(k)) \left( ch_3(\Delta^2) - H_{p+2}(\chi_p^2(\alpha); \Delta^2) \right. \\
& \quad \left. + E[(1 - c\chi_{p+2}^2(\Delta^2))^2 I(\chi_{p+2}^2(\Delta^2) \leq c)] \right) \\
& \quad - \delta^T [R(k)]^T R(k) \delta \left( h_2(\alpha; \Delta^2) - c(c+4) E[\chi_{p+4}^{-4}(\Delta^2)] + h_4(\Delta^2) \right) \\
& \quad - k(\delta^T C^{-1}(k) R(k) \delta + \delta^T [R(k)]^T C^{-1}(k) \delta) \left( cE[\chi_{p+2}^{-2}(\Delta^2)] \right. \\
& \quad \left. - H_{p+2}(\chi_p^2(\alpha); \Delta^2) + E[(1 - c\chi_{p+2}^{-2}(\Delta^2)) I(\chi_{p+2}^2(\Delta^2) \leq c)] \right) \quad (\text{S28})
\end{aligned}$$

The r.h.s. of (S28) will be non-negative when

$$\begin{aligned}
& \delta^T \left( [R(k)]^T R(k) f_8(\Delta^2) - k(C^{-1}(k) R(k) + [R(k)]^T C^{-1}(k)) f_9(\Delta^2) \right) \delta \\
& \leq \eta^2 \text{tr}([R(k)]^T C^{-1} R(k)) \left( ch_3(\Delta^2) - H_{p+2}(\chi_p^2(\alpha); \Delta^2) + E[(1 - c\chi_{p+2}^2(\Delta^2))^2 I(\chi_{p+2}^2(\Delta^2) \leq c)] \right) \quad (\text{S29})
\end{aligned}$$

where

$$\begin{aligned}
f_8(\Delta^2) &= h_2(\alpha; \Delta^2) - c(c+4) E[\chi_{p+4}^{-4}(\Delta^2)] + h_4(\Delta^2) \\
f_9(\Delta^2) &= cE[\chi_{p+2}^{-2}(\Delta^2)] - H_{p+2}(\chi_p^2(\alpha); \Delta^2) + E[(1 - c\chi_{p+2}^{-2}(\Delta^2)) I(\chi_{p+2}^2(\Delta^2) \leq c)] \quad (\text{S30})
\end{aligned}$$

Again with using Courant's theorem for Eq. (S29), PRRME dominates PTRME when

$$\begin{aligned}
\Delta^2 &\leq \frac{\text{tr}([R(k)]^T C^{-1} R(k)) \left( ch_3(\Delta^2) - H_{p+2}(\chi_p^2(\alpha); \Delta^2) + E[(1 - c\chi_{p+2}^2(\Delta^2))^2 I(\chi_{p+2}^2(\Delta^2) \leq c)] \right)}{Ch_{\min}([R(k)]^T R(k) f_8(\Delta^2) - k(C^{-1}(k) R(k) + [R(k)]^T C^{-1}(k)) f_9(\Delta^2)) C^{-1}} \\
&= \Delta_3^2(k; \alpha)
\end{aligned}$$

and PTRME is superior to PRRME when

$$\begin{aligned}
\Delta^2 &\geq \frac{\text{tr}([R(k)]^T C^{-1} R(k)) \left( ch_3(\Delta^2) - H_{p+2}(\chi_p^2(\alpha); \Delta^2) + E[(1 - c\chi_{p+2}^2(\Delta^2))^2 I(\chi_{p+2}^2(\Delta^2) \leq c)] \right)}{Ch_{\max}([R(k)]^T R(k) f_8(\Delta^2) - k(C^{-1}(k) R(k) + [R(k)]^T C^{-1}(k)) f_9(\Delta^2)) C^{-1}} \\
&= \Delta_3'^2(k; \alpha)
\end{aligned}$$

Now, we consider the risk difference of PRRME and PTRME as a function of eigenvalues as

$$\begin{aligned}
& \sum_{i=1}^p \frac{\lambda_i}{(\lambda_i + k)^2} \left\{ \eta^2 \left( ch_3(\Delta^2) - H_{p+2}(\chi_p^2(\alpha); \Delta^2) + E[(1 - c\chi_{p+2}^2(\Delta^2))^2 I(\chi_{p+2}^2(\Delta^2) \leq c)] \right) \right. \\
& \quad \left. - \lambda_i \theta_i^2 f_8(\Delta^2) - 2k \theta_i^2 f_9(\Delta^2) \right\}.
\end{aligned}$$



On the other hand, the risk difference is non-negative whenever there exists a  $k \in (0, k_3(\Delta^2))$ , where

$$k_3(\Delta^2) = \frac{f_{10}(\Delta^2)}{\max_{1 \leq i \leq p} \{2\theta_i^2 f_9(\Delta^2)\}}.$$

where

$$f_{10}(\Delta^2) = \min_{1 \leq i \leq p} \left\{ \eta^2 (ch_3(\Delta^2) - H_{p+2}(\chi_p^2(\alpha); \Delta^2) + E[(1 - c\chi_{p+2}^2(\Delta^2))^2 I(\chi_{p+2}^2(\Delta^2) \leq c)]) - \lambda_i \theta_i^2 f_8(\Delta^2) \right\}$$

**Proof of Theorem 4.4 (Comparison between PRRME and SRME):**

The risk difference of two estimators is given by

$$\begin{aligned} \text{ADR}(\hat{\beta}_n^{(M)S}(k); I_p) - \text{ADR}(\hat{\beta}_n^{(M)S+}(k); I_p) &= \\ & \eta^2 \text{tr}([R(k)]^T C^{-1} R(k)) E \left[ (1 - c\chi_{p+2}^{-2}(\Delta^2))^2 I(\chi_{p+2}^2(\Delta^2) \leq c) \right] \\ & + 2k\delta^T [R(k)]^T C^{-1}(k)\delta E \left[ (c\chi_{p+2}^{-2}(\Delta^2) - 1) I(\chi_{p+2}^2(\Delta^2) \leq c) \right] \\ & - \delta^T [R(k)]^T R(k)\delta h_4(\Delta^2) \\ & = \eta^2 \text{tr}([R(k)]^T C^{-1} R(k)) E \left[ (1 - c\chi_{p+2}^{-2}(\Delta^2))^2 I(\chi_{p+2}^2(\Delta^2) \leq c) \right] \\ & + \delta^T [R(k)]^T R(k)\delta E \left[ (1 - c\chi_{p+4}^2(\Delta^2))^2 I(\chi_{p+4}^2(\Delta^2) \leq c) \right] \\ & + 2\delta^T [R(k)]^T R(k)\delta E \left[ (c\chi_{p+2}^{-2}(\Delta^2) - 1) I(\chi_{p+2}^2(\Delta^2) \leq c) \right] \\ & + 2k\delta^T [R(k)]^T C^{-1}(k)\delta E \left[ (c\chi_{p+2}^{-2}(\Delta^2) - 1) I(\chi_{p+2}^2(\Delta^2) \leq c) \right] \end{aligned} \quad (\text{S31})$$

The r.h.s. is positive, since the expectation of a positive random variable is positive and by the definition of an indicator function,

$$0 < \chi_{p+2}^2(\Delta^2) \leq c \iff c\chi_{p+2}^{-2}(\Delta^2) - 1 \geq 0.$$

We get  $E \left[ (c\chi_{p+2}^{-2}(\Delta^2) - 1) I(\chi_{p+2}^2(\Delta^2) \leq c) \right] \geq 0$ . Thus, for all  $\Delta^2$ ,  $\text{ADR}(\hat{\beta}_n^{(M)S+}(k); I_p) \leq \text{ADR}(\hat{\beta}_n^{(M)S}(k); I_p)$ . The PRRME not only confirms inadmissibility of SRME but also provides a simple superior estimator.

The expression (S31) in terms of eigenvalues is given by

$$\begin{aligned} & \sum_{i=1}^p \frac{\lambda_i}{(\lambda_i + k)^2} \left\{ \eta^2 E \left[ (1 - c\chi_{p+2}^{-2}(\Delta^2))^2 I(\chi_{p+2}^2(\Delta^2) \leq c) \right] - \lambda_i \theta_i^2 h_4(\Delta^2) \right. \\ & \quad \left. - 2k\theta_i^2 E \left[ (1 - c\chi_{p+2}^{-2}(\Delta^2)) I(\chi_{p+2}^2(\Delta^2) \leq c) \right] \right\}. \end{aligned} \quad (\text{S32})$$

We define

$$k_4(\Delta^2) = \frac{\min_{1 \leq i \leq p} \left\{ \eta^2 E \left[ (1 - c\chi_{p+2}^{-2}(\Delta^2))^2 I(\chi_{p+2}^2(\Delta^2) \leq c) \right] - \lambda_i \theta_i^2 h_4(\Delta^2) \right\}}{\max_{1 \leq i \leq p} \left\{ 2\theta_i^2 E \left[ (1 - c\chi_{p+2}^{-2}(\Delta^2)) I(\chi_{p+2}^2(\Delta^2) \leq c) \right] \right\}},$$

for  $k \in [0, k_4(\Delta^2)]$ , PRRME dominates SRME.

### Comparison between URME and UME

The asymptotic risk function of  $\hat{\beta}_n^{(M)U}(k)$  is given by

$$\text{ADR}(\hat{\beta}_n^{(M)U}(k)) = \eta^2 \sum_{i=1}^p \frac{\lambda_i}{(\lambda_i + k)^2} + k^2 \sum_{i=1}^p \frac{\theta_i^2}{(\lambda_i + k)^2}. \quad (\text{S33})$$

Differentiating (S33) w.r.t.  $k$ , we get

$$\frac{\partial \text{ADR}(\hat{\beta}_n^{(M)U}(k))}{\partial k} = 2 \sum_{i=1}^p \frac{\lambda_i}{(\lambda_i + k)^3} (k\theta_i^2 - \eta^2). \quad (\text{S34})$$

Next, we define

$$k_5 = \frac{\eta^2}{\max_{1 \leq i \leq p} \theta_i^2} = \frac{\eta^2}{\theta_{\max}^2}, \quad (\text{S35})$$

where  $\theta_{\max}$  is the largest element of  $\boldsymbol{\theta}$ . We see that a sufficient condition for (S34) to be negative is that there exists a  $k \in (0, k_5)$  such that URME has smaller risk than UME.

Also, the risk difference is

$$\text{ADR}(\hat{\beta}_n^{(M)U}; I_p) - \text{ADR}(\hat{\beta}_n^{(M)U}(k); I_p) = \eta^2 \text{tr}(C^{-1} - [R(k)]^T C^{-1} R(k)) - k^2 \boldsymbol{\delta}^T C^{-2}(k) \boldsymbol{\delta}. \quad (\text{S36})$$

A sufficient condition for  $\text{ADR}(\hat{\beta}_n^{(M)U}(k); I_p)$  to be smaller than  $\text{ADR}(\hat{\beta}_n^{(M)U}; I_p) = \eta^2 \text{tr}(C^{-1})$  is that Eq. (S36) be non-negative. i.e.

$$\boldsymbol{\delta}^T C^{-2}(k) \boldsymbol{\delta} \leq \frac{\eta^2 \text{tr}(C^{-1} - [R(k)]^T C^{-1} R(k))}{k^2}. \quad (\text{S37})$$

By Courant-Fisher theorem

$$Ch_{\min}(C^{-2}(k)C^{-1}) \leq \frac{\boldsymbol{\delta}^T C^{-2}(k) \boldsymbol{\delta}^T}{\boldsymbol{\delta}^T \boldsymbol{\delta}^T} = \frac{\boldsymbol{\delta}^T C^{\frac{1}{2}} C^{-2}(k) C^{-1} C^{\frac{1}{2}} \boldsymbol{\delta}^T}{\boldsymbol{\delta}^T C^{\frac{1}{2}} C^{\frac{1}{2}} \boldsymbol{\delta}^T} \leq Ch_{\max}(C^{-2}(k)C^{-1}),$$

and then

$$\frac{\boldsymbol{\delta}^T C^{-2}(k) \boldsymbol{\delta}^T}{Ch_{\max}(C^{-2}(k)C^{-1})} \leq \boldsymbol{\delta}^T C \boldsymbol{\delta}^T \leq \frac{\boldsymbol{\delta}^T C^{-2}(k) \boldsymbol{\delta}^T}{Ch_{\min}(C^{-2}(k)C^{-1})} \quad (\text{S38})$$

Substituting Eq. (S37) in Eq. (S38) results in

$$\Delta^2 \leq \frac{\text{tr}(C^{-1} - [R(k)]^T C^{-1} R(k))}{k^2 Ch_{\min}(C^{-2}(k)C^{-1})} = \Delta_4(k).$$

### Comparison between PTRME and PTME

*Case 1. Null hypothesis,  $\mathcal{H}_0 : \boldsymbol{\beta} = \mathbf{0}$ :* The risk difference in this case is given by

$$\eta^2 \text{tr}(C^{-1} - R^T(k)C^{-1}R(k))(1 - H_{p+2}(\chi_p^2(\alpha); 0)) \geq 0.$$

Hence,  $\hat{\beta}_n^{(M)PT}(k)$  dominates  $\hat{\beta}_n^{(M)PT}$  uniformly for all  $k$  and  $\alpha$ .

*Case 2. Alternative hypothesis,  $\mathcal{H}_A : \beta \neq \mathbf{0}$ :* The risk difference is given by

$$\begin{aligned} \text{ADR}(\hat{\beta}_n^{(M)PT}; I_p) - \text{ADR}(\hat{\beta}_n^{(M)PT}(k); I_p) = & \\ & \eta^2 \text{tr}(C^{-1} - [R(k)]^T C^{-1} R(k))(1 - H_{p+2}(\chi_p^2(\alpha); \Delta^2)) \\ & - k \{ \boldsymbol{\delta}^T C^{-1}(k) R(k) \boldsymbol{\delta} + \boldsymbol{\delta} [R(k)]^T C^{-1}(k) \boldsymbol{\delta} \} H_{p+2}(\chi_p^2(\alpha); \Delta^2) \\ & + \boldsymbol{\delta}^T (I_p - [R(k)]^T R(k)) \boldsymbol{\delta} h_2(\alpha; \Delta^2) - k^2 \boldsymbol{\delta}^T C^{-2}(k) \boldsymbol{\delta} \end{aligned} \quad (\text{S39})$$

The expression (S39) is non-negative if and only if

$$\begin{aligned} & \eta^2 \text{tr}(C^{-1} - [R(k)]^T C^{-1} R(k))(1 - H_{p+2}(\chi_p^2(\alpha); \Delta^2)) \geq \\ & \boldsymbol{\delta}^T [k^2 C^{-2}(k) + k(C^{-1}(k) R(k) + [R(k)]^T C^{-1}(k)) H_{p+2}(\chi_p^2(\alpha); \Delta^2) - (I_p - [R(k)]^T R(k)) h_2(\alpha; \Delta^2)] \boldsymbol{\delta}, \end{aligned}$$

By standard calculation using Courant's theorem, we obtain

$$\Delta^2 \leq \frac{\text{tr}(C^{-1} - [R(k)]^T C^{-1} R(k))(1 - H_{p+2}(\chi_p^2(\alpha); \Delta^2))}{Ch_{\min}(f_{11}(\alpha, \Delta^2) C^{-1})} = \Delta_5^2(k, \alpha),$$

where

$$\begin{aligned} f_{11}(\alpha, \Delta^2) = & k^2 C^{-2}(k) + k(C^{-1}(k) R(k) + [R(k)]^T C^{-1}(k)) H_{p+2}(\chi_p^2(\alpha); \Delta^2) \\ & - (I_p - [R(k)]^T R(k)) h_2(\alpha; \Delta^2) \end{aligned}$$

And, PTRME dominates PTME when

$$\Delta^2 \geq \frac{\text{tr}(C^{-1} - [R(k)]^T C^{-1} R(k))(1 - H_{p+2}(\chi_p^2(\alpha); \Delta^2))}{Ch_{\max}(f_{11}(\alpha, \Delta^2) C^{-1})} = \Delta_5'^2(k, \alpha),$$

If we rewrite the expression of  $\text{ADR}(\hat{\beta}_n^{(M)PT}(k))$  in terms of eigenvalues and  $k$ , we have

$$\begin{aligned} \text{ADR}(\hat{\beta}_n^{(M)PT}(k)) = & \sum_{i=1}^p \frac{1}{(\lambda_i + k)^2} \{ \eta^2 \lambda_i (1 - H_{p+2}(\chi_p^2(\alpha); \Delta^2)) + \lambda_i^2 \theta_i^2 h_2(\alpha; \Delta^2) \\ & + k^2 \theta_i^2 + 2k \lambda_i \theta_i^2 H_{p+2}(\chi_p^2(\alpha); \Delta^2) \} \end{aligned}$$

Differentiating the risk of PTRME w.r.t.  $k$ , we obtain

$$\begin{aligned} \frac{\partial \text{ADR}(\hat{\beta}_n^{(M)PT}(k))}{\partial k} = & -2 \sum_{i=1}^p \frac{\lambda_i}{(\lambda_i + k)^3} \left\{ \eta^2 (1 - H_{p+2}(\chi_p^2(\alpha); \Delta^2)) - k \theta_i^2 (1 - H_{p+2}(\chi_p^2(\alpha); \Delta^2)) \right. \\ & \left. + \lambda_i \theta_i^2 (H_{p+2}(\chi_p^2(\alpha); \Delta^2) - H_{p+4}(\chi_p^2(\alpha); \Delta^2)) \right\} \end{aligned} \quad (\text{S40})$$

A sufficient condition for (S40) to be negative is that there exists a  $k \in (0, k_6(\alpha, \Delta^2))$ , whenever

$$k_6(\alpha, \Delta^2) = \frac{f_{12}(\Delta^2)}{\max_{1 \leq i \leq p} \{ \theta_i^2 (1 - H_{p+2}(\chi_p^2(\alpha); \Delta^2)) \}} \quad (\text{S41})$$

where

$$f_{12}(\Delta^2) = \min_{1 \leq i \leq p} \{ \eta^2 (1 - H_{p+2}(\chi_p^2(\alpha); \Delta^2)) + \lambda_i \theta_i^2 (H_{p+2}(\chi_p^2(\alpha); \Delta^2) - H_{p+4}(\chi_p^2(\alpha); \Delta^2)) \} \quad (\text{S42})$$

Thus,  $\hat{\beta}_n^{(\text{M})\text{PT}}(k)$  is superior to  $\hat{\beta}_n^{(\text{M})\text{PT}}$  whenever  $k \in (0, k_6(\alpha, \Delta^2))$  under  $\mathcal{H}_A$ .

### Comparison between PTRME and URME

The risk difference between PTRME and URME is

$$\begin{aligned} \text{ADR}(\hat{\beta}_n^{(\text{M})\text{U}}(k)) - \text{ADR}(\hat{\beta}_n^{(\text{M})\text{PT}}(k)) &= \eta^2 \text{tr}([R(k)]^T C^{-1} R(k)) H_{p+2}(\chi_p^2(\alpha); \Delta^2) \\ &\quad - \delta^T [R(k)]^T R(k) \delta h_2(\alpha; \Delta^2) - k (\delta^T C^{-1}(k) R(k) \delta \\ &\quad + \delta^T [R(k)]^T C^{-1}(k) \delta) H_{p+2}(\chi_p(\alpha); \Delta^2) \end{aligned} \quad (\text{S43})$$

The expression is non-negative whenever

$$\begin{aligned} \delta^T [[R(k)]^T R(k) h_2(\alpha; \Delta^2) + k (C^{-1}(k) R(k) + [R(k)]^T C^{-1}(k)) H_{p+2}(\chi_p(\alpha); \Delta^2)] \delta \\ \leq \eta^2 \text{tr}([R(k)]^T C^{-1} R(k)) H_{p+2}(\chi_p^2(\alpha); \Delta^2) \end{aligned} \quad (\text{S44})$$

Again, using the Courant's theorem, we obtain Eq. (S43)  $\geq 0$  according to

$$\Delta^2 \leq \frac{\text{tr}([R(k)]^T C^{-1} R(k)) H_{p+2}(\chi_p^2(\alpha); \Delta^2)}{C H_{\min}(f_{13}(\alpha, \Delta^2) C^{-1})} = \Delta_6^2(k, \alpha), \quad (\text{S45})$$

where

$$f_{13}(\alpha, \Delta^2) = [R(k)]^T R(k) h_2(\alpha; \Delta^2) + k (C^{-1}(k) R(k) + [R(k)]^T C^{-1}(k)) H_{p+2}(\chi_p(\alpha); \Delta^2)$$

Thus,  $\hat{\beta}_n^{(\text{M})\text{PT}}(k)$  dominates  $\hat{\beta}_n^{(\text{M})\text{U}}(k)$  whenever  $\Delta^2 \in (0, \Delta_3^2(k, \alpha))$ .

Rewriting the expression (S43) in terms of eigenvalues and  $k$ , we obtain

$$\begin{aligned} \text{ADR}(\hat{\beta}_n^{(\text{M})\text{U}}(k)) - \text{ADR}(\hat{\beta}_n^{(\text{M})\text{PT}}(k)) &= \\ \sum_{i=1}^p \frac{\lambda_i}{(\lambda_i + k)^2} \{ \eta^2 H_{p+2}(\chi_p^2(\alpha); \Delta^2) - \lambda_i \theta_i^2 h_2(\alpha; \Delta^2) - 2k \theta_i^2 H_{p+2}(\chi_p^2(\alpha); \Delta^2) \} \end{aligned} \quad (\text{S46})$$

The r.h.s. is non-negative when  $k \leq k_7(\alpha, \Delta^2)$ , where

$$k_7(\alpha, \Delta^2) = \frac{\min_{1 \leq i \leq p} \{ \eta^2 H_{p+2}(\chi_p^2(\alpha); \Delta^2) - \lambda_i \theta_i^2 h_2(\alpha; \Delta^2) \}}{\max_{1 \leq i \leq p} \{ 2 \theta_i^2 H_{p+2}(\chi_p^2(\alpha); \Delta^2) \}} \quad (\text{S47})$$

Thus, PTRME dominates URME when  $k \in (0, k_7(\alpha, \Delta^2))$  and URME will dominate PTRME when  $k > k_7(\alpha, \Delta^2)$ .

### Comparison of SRME and SME

*Case 1. Null hypothesis,  $\mathcal{H}_o : \beta = \mathbf{0}$ :* In this case, the risk difference is given by

$$\text{ADR}(\hat{\beta}_n^{(\text{M})\text{S}}) - \text{ADR}(\hat{\beta}_n^{(\text{M})\text{S}}(k)) = \eta^2 \text{tr}(C^{-1} - [R(k)]^T C^{-1} R(k)) (1 - ch_3(0))$$

which is non-negative for all  $k$  if  $0 < c < 2(p-2)$ , Since  $h_3(0) = (2(p-2) - c)/(p(p-2))$ .

*Case 2. Alternative hypothesis,  $\mathcal{H}_A : \beta \neq 0$ :* In this case, the risk difference is given by

$$\begin{aligned} \text{ADR}(\hat{\beta}_n^{(M)S}) - \text{ADR}(\hat{\beta}_n^{(M)S}(k)) &= \eta^2 \text{tr}(C^{-1} - [R(k)]^T C^{-1} R(k))(1 - ch_3(\Delta^2)) \\ &\quad + c(c+4) \delta^T (I_p - [R(k)]^T R(k)) \delta E \left[ \chi_{p+4}^{-4}(\Delta^2) \right] - k^2 \delta^T C^{-2}(k) \delta \\ &\quad - k \delta^T [C^{-1}(k) R(k) + [R(k)]^T C^{-1}(k)] \delta E \left[ \chi_{p+2}^{-2}(\Delta^2) \right] \end{aligned} \quad (\text{S48})$$

Using Courant's theorem, the SRME is superior to SME whenever  $\Delta^2 \leq \Delta_7^2(k)$  which is defined by

$$\Delta_7^2(k) = \frac{\text{tr}(C^{-1} - [R(k)]^T C^{-1} R(k))(1 - ch_3(\Delta^2))}{Ch_{\min}(f_{14}(\Delta^2)C^{-1})}, \quad (\text{S49})$$

where

$$\begin{aligned} f_{14}(\Delta^2) &= k^2 C^{-1}(k) + k(C^{-1}(k)R(k) + [R(k)]^T C^{-1}(k))E \left[ \chi_{p+2}^{-2}(\Delta^2) \right] \\ &\quad - c(c+4)(I_p - [R(k)]^T R(k))E \left[ \chi_{p+4}^{-4}(\Delta^2) \right] \end{aligned} \quad (\text{S50})$$

However, SME is superior to SRME when  $\Delta^2 > \Delta_7^2(k)$  is defined by

$$\Delta_7'^2(k) = \frac{\text{tr}(C^{-1} - [R(k)]^T C^{-1} R(k))(1 - ch_3(\Delta^2))}{Ch_{\max}(f_{14}(\Delta^2)C^{-1})}. \quad (\text{S51})$$

In this case, the risk function in terms of eigenvalues is given by Eq. (S19). Differentiating it w.r.t.  $k$ , we obtain Eq. (S21). Hence, a sufficient condition for (S21) to be negative is that there exists a  $k$  such that  $0 < k < k_8(\Delta^2)$  where

$$k_8(\Delta^2) = \frac{\min_{1 \leq i \leq p} \left\{ \eta^2(1 - ch_3(\Delta^2)) + c(c+4)\lambda_i \theta_i^2 E \left[ \chi_{p+4}^{-4}(\Delta^2) \right] - c\lambda_i \theta_i^2 E \left[ \chi_{p+2}^{-2}(\Delta^2) \right] \right\}}{\max_{1 \leq i \leq p} \left\{ \theta_i^2 \left( 1 - cE \left[ \chi_{p+2}^{-2}(\Delta^2) \right] \right) \right\}}$$

Hence,  $\hat{\beta}_n^{(M)S}(k)$  has smaller risk than  $\hat{\beta}_n^{(M)S}$  for  $k \in [0, k_8(\Delta^2)]$ .

### Comparison of SRME with URME

We consider the risk difference of SRME and URME as

$$\begin{aligned} \text{ADR}(\hat{\beta}_n^{(M)U}(k)) - \text{ADR}(\hat{\beta}_n^{(M)S}(k)) &= c\eta^2 \text{tr}([R(k)]^T C^{-1} R(k)) h_3(\Delta^2) \\ &\quad - c(c+4) \delta^T [R(k)]^T R(k) \delta E \left[ \chi_{p+4}^{-4}(\Delta^2) \right] - ck(\delta^T C^{-1}(k) R(k) \delta \\ &\quad + \delta^T [R(k)]^T C^{-1}(k) \delta) E \left[ \chi_{p+2}^{-2}(\Delta^2) \right] \end{aligned} \quad (\text{S52})$$

The above difference will be non-negative when

$$\delta^T \left[ (c+4)[R(k)]^T R(k) E \left[ \chi_{p+4}^{-4}(\Delta^2) \right] + k(C^{-1}(k)R(k) + [R(k)]^T C^{-1}(k))E \left[ \chi_{p+2}^{-2}(\Delta^2) \right] \right] \delta \leq \eta^2 \text{tr}([R(k)]^T C^{-1} R(k)) h_3(\Delta^2)$$

Using Courant's theorem, the SRME dominates URME when

$$\Delta^2 \leq \frac{\text{tr}([R(k)]^T C^{-1} R(k)) h_3(\Delta^2)}{C h_{\min}(f_{15}(\Delta^2) C^{-1})} = \Delta_8^2(k),$$

and URME is superior to SRME when

$$\Delta^2 \geq \frac{\text{tr}([R(k)]^T C^{-1} R(k)) h_3(\Delta^2)}{C h_{\max}(f_{15}(\Delta^2) C^{-1})} = \Delta_8'^2(k),$$

where

$$f_{15}(\Delta^2) = (c+4)[R(k)]^T R(k) E \left[ \chi_{p+4}^{-4}(\Delta^2) \right] + k(C^{-1}(k)R(k) + [R(k)]^T C^{-1}(k)) E \left[ \chi_{p+2}^{-2}(\Delta^2) \right].$$

To find a sufficient condition on  $k$ , we consider the expression (S52) according to eigenvalues as

$$\sum_{i=1}^p \frac{c\lambda_i}{(\lambda_i + k)^2} \left\{ \eta^2 h_3(\Delta^2) - (c+4)\lambda_i \theta_i^2 E \left[ \chi_{p+4}^{-4}(\Delta^2) \right] - 2k\theta_i^2 E \left[ \chi_{p+2}^{-2}(\Delta^2) \right] \right\}$$

It is non-negative when there exists a value of  $k \in (0, k_9(\Delta^2))$ , where

$$k_9(\Delta^2) = \frac{\min_{1 \leq i \leq p} \left\{ \eta^2 h_3(\Delta^2) - (c+4)\lambda_i \theta_i^2 E \left[ \chi_{p+4}^{-4}(\Delta^2) \right] \right\}}{\max_{1 \leq i \leq p} \left\{ 2\theta_i^2 E \left[ \chi_{p+2}^{-2}(\Delta^2) \right] \right\}}$$

Note that the risk difference (S52) under  $\mathcal{H}_0 : \beta = \mathbf{0}$  is

$$c\eta^2 \text{tr}([R(k)]^T C^{-1} R(k)) h_3(0) \geq 0, \quad \text{if } c \leq 2(p-2).$$

Thus, SRME dominates URME under the null hypothesis for  $c \leq 2(p-2)$ .

### Comparison between SRME and PTRME

The risk difference in this case is

$$\begin{aligned} \text{ADR} \left( \hat{\beta}_n^{(M)PT} (k) \right) - \text{ADR} \left( \hat{\beta}_n^{(M)S} (k) \right) = & \\ & \eta^2 \text{tr}([R(k)]^T C^{-1} R(k)) (c h_3(\Delta^2) - H_{p+2}(\chi_p^2(\alpha); \Delta^2)) \\ & - \delta^T [R(k)]^T R(k) \delta \left( h_2(\alpha; \Delta^2) - c(c+4) E \left[ \chi_{p+4}^{-4}(\Delta^2) \right] \right) \\ & - k(\delta^T C^{-1}(k)R(k)\delta + \delta^T [R(k)]^T C^{-1}(k)\delta) \\ & \times \left( c E \left[ \chi_{p+2}^{-2}(\Delta^2) \right] - H_{p+2}(\chi_p^2(\alpha); \Delta^2) \right) \end{aligned} \quad (\text{S53})$$

The right side of (S53) will be non-negative if

$$\delta^T [f_{16}(\alpha, \Delta^2)[R(k)]^T R(k) - k f_{17}(\alpha, \Delta^2)(C^{-1}(k)R(k) + [R(k)]^T C^{-1}(k))] \delta \leq \eta^2 \text{tr}([R(k)]^T C^{-1} R(k)) (c h_3(\Delta^2) - H_{p+2}(\chi_p^2(\alpha); \Delta^2)),$$

where

$$\begin{aligned} f_{16}(\alpha, \Delta^2) &= h_2(\alpha; \Delta^2) - c(c+4)E \left[ \chi_{p+4}^{-4}(\Delta^2) \right] \\ f_{17}(\alpha, \Delta^2) &= cE \left[ \chi_{p+2}^{-2}(\Delta^2) \right] - H_{p+2}(\chi_p^2(\alpha); \Delta^2). \end{aligned} \quad (\text{S54})$$

Using Courant's theorem, SRME dominates PTRME when

$$\Delta^2 \leq \frac{\eta^2 \text{tr}([R(k)]^T C^{-1} R(k)) (c h_3(\Delta^2) - H_{p+2}(\chi_p^2(\alpha); \Delta^2))}{C h_{\min}(f_{16}(\alpha, \Delta^2)[R(k)]^T R(k) - k f_{17}(\alpha, \Delta^2)(C^{-1}(k)R(k) + [R(k)]^T C^{-1}(k))C^{-1})} = \Delta_9^2(k).$$

However, PTRME is superior to SRME when

$$\Delta^2 > \frac{\eta^2 \text{tr}([R(k)]^T C^{-1} R(k)) (c h_3(\Delta^2) - H_{p+2}(\chi_p^2(\alpha); \Delta^2))}{C h_{\max}(f_{16}(\alpha, \Delta^2)[R(k)]^T R(k) - f_{17}(\alpha, \Delta^2)(C^{-1}(k)R(k) + [R(k)]^T C^{-1}(k))C^{-1})} = \Delta_9'^2(k).$$

Now, we consider the risk difference in (S53) as a function of eigenvalues as

$$\sum_{i=1}^p \frac{\lambda_i}{(\lambda_i + k)^2} \left\{ \eta^2 (c h_3(\Delta^2) - H_{p+2}(\chi_p^2(\alpha); \Delta^2)) - \lambda_i \theta_i^2 f_{16}(\alpha, \Delta^2) - 2k \theta_i^2 f_{17}(\alpha, \Delta^2) \right\}.$$

The above expression is non-negative whenever there exists a value  $k \in (0, k_{10}(\Delta^2)]$ , where

$$k_{10}(\Delta^2) = \frac{\min_{1 \leq i \leq p} \left\{ \eta^2 (c h_3(\Delta^2) - H_{p+2}(\chi_p^2(\alpha); \Delta^2)) - \lambda_i \theta_i^2 f_{16}(\alpha, \Delta^2) \right\}}{\max_{1 \leq i \leq p} \left\{ 2\theta_i^2 f_{17}(\alpha, \Delta^2) \right\}}.$$

Note that under  $\mathcal{H}_o$ , the risk difference (S53) reduces to

$$\eta^2 \text{tr}([R(k)]^T C^{-1} R(k)) (c h_3(0) - H_{p+2}(\chi_p^2(\alpha); 0)).$$

Thus, SRME dominates PTRME when

$$\begin{aligned} (c h_3(0) - H_{p+2}(\chi_p^2(\alpha); 0)) \geq 0 &\iff \frac{2c(p-2) - c^2}{p(p-2)} \geq H_{p+2}(\chi_p^2(\alpha); 0) \\ &\iff \chi_p^2(\alpha) \leq H_{p+2}^{-1} \left( \frac{2c(p-2) - c^2}{p(p-2)} \right). \end{aligned}$$

Otherwise, PTRME is superior to SRME.

In the end of this section, to have a clear imagine and better understanding, we consider  $C = I_p$  and for different values of  $p$ ,  $k$ ,  $\eta^2$  and  $\alpha$  some graphs are presented. Figures S1 and S2 confirms that superiority of improved Huberized ridge estimators depends to  $k$  and  $\Delta^2$ .

### S3 More Details on Graphical Representations

In this section, more plots (Figures S3-S7) are presented to illustrate the properties of the proposed estimators, clearly.

Also, Table S1 is produced to find the effect of number of independent variables on choosing  $k$ . We supposed that some different values for  $k$  and in each case and compared the behavior of estimators with increasing  $p$ . The larger  $p$ , the better performance of all proposed estimators. However, observing the different behavior of them for  $p = 30$  confirms that it depends to choice of  $k$ ,  $\eta^2$  and  $\alpha$  for any value of  $p$ .

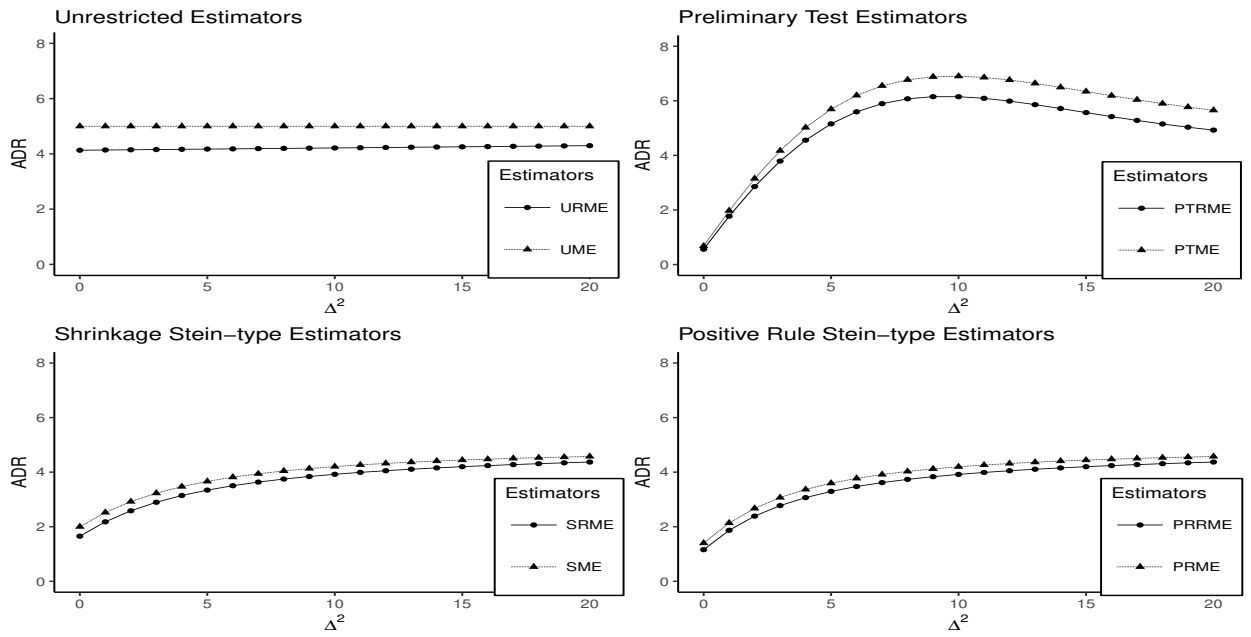

Figure S1: Comparison of Estimators for  $p = 5$ ,  $\alpha = 0.05$  and  $k = 0.1$

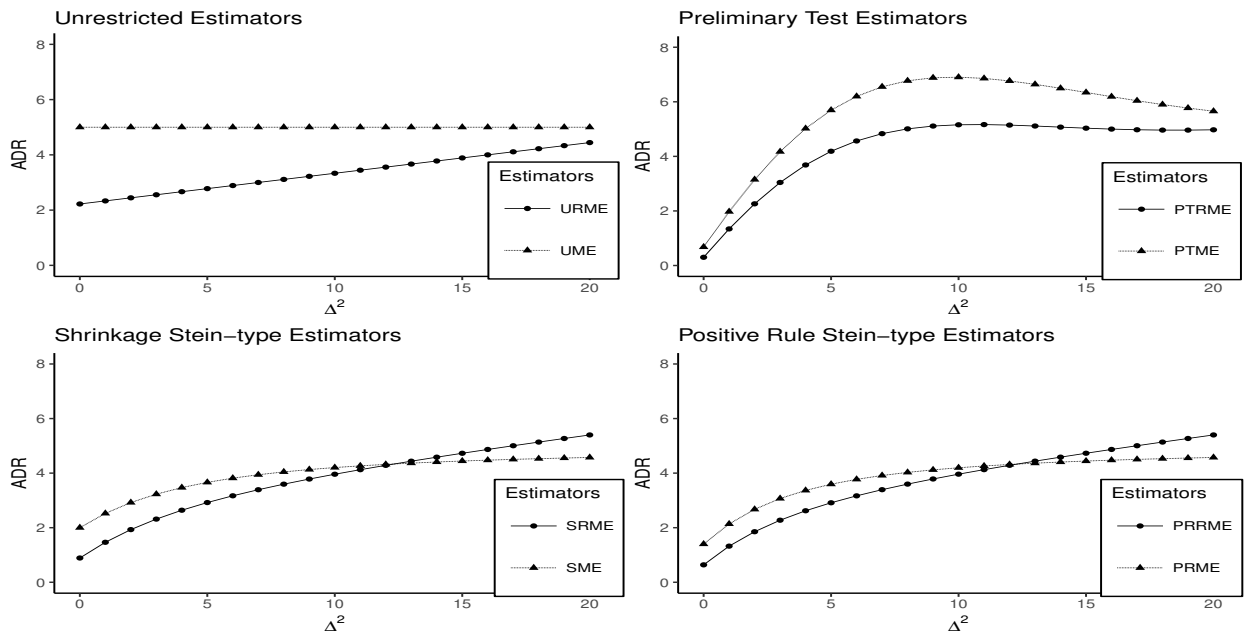

Figure S2: Comparison of Estimators for  $p = 5$ ,  $\alpha = 0.05$  and  $k = 0.5$



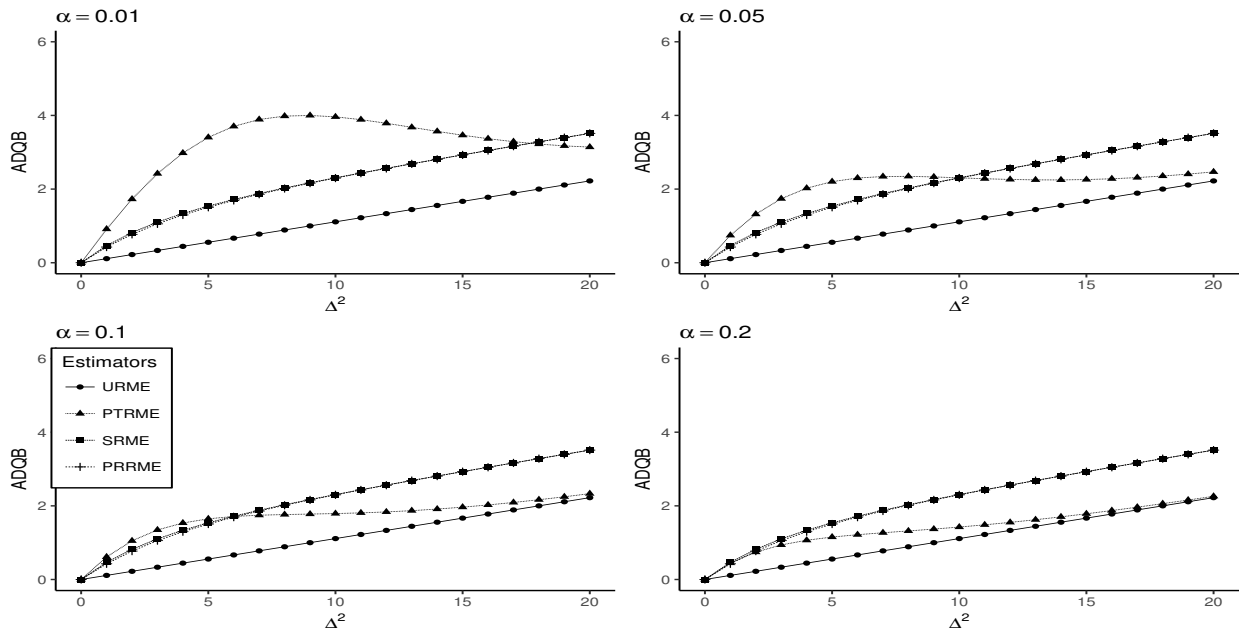

Figure S3: Asymptotic quadratic bias behavior of the estimators for  $p = 5$ ,  $k = 0.5$ ,  $\eta^2 = 1$ , and different  $\alpha$ .

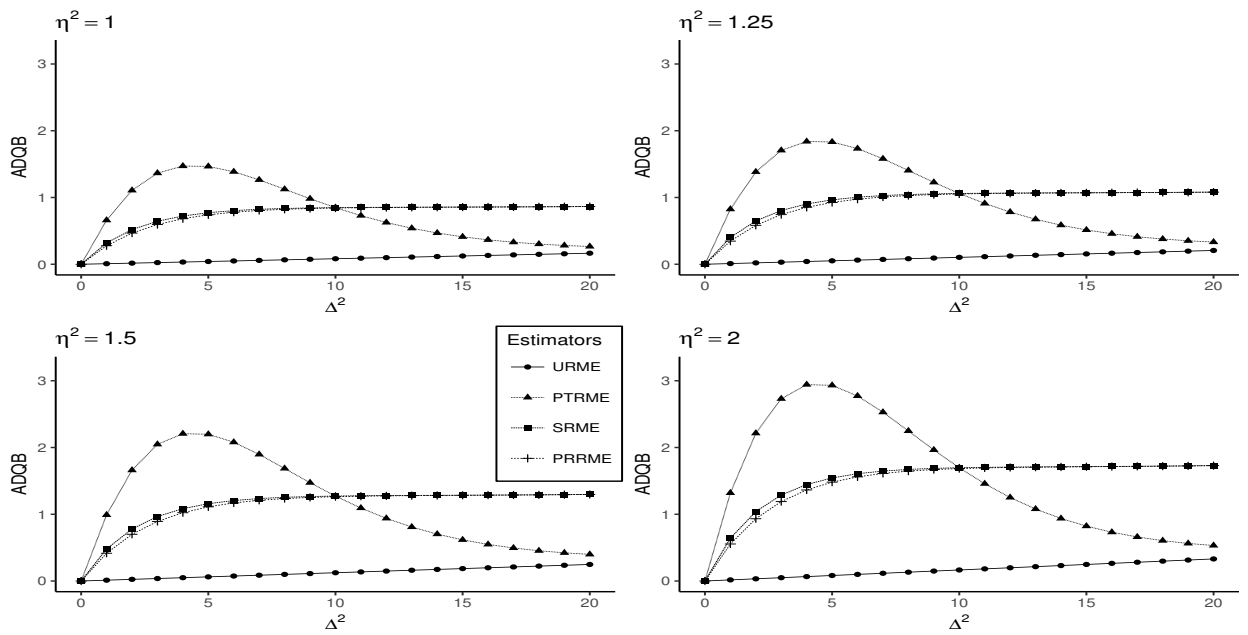

Figure S4: Asymptotic quadratic bias behavior of the estimators for  $p = 5$ ,  $k = 0.1$ ,  $\alpha = 0.05$ , and different  $\eta^2$ .

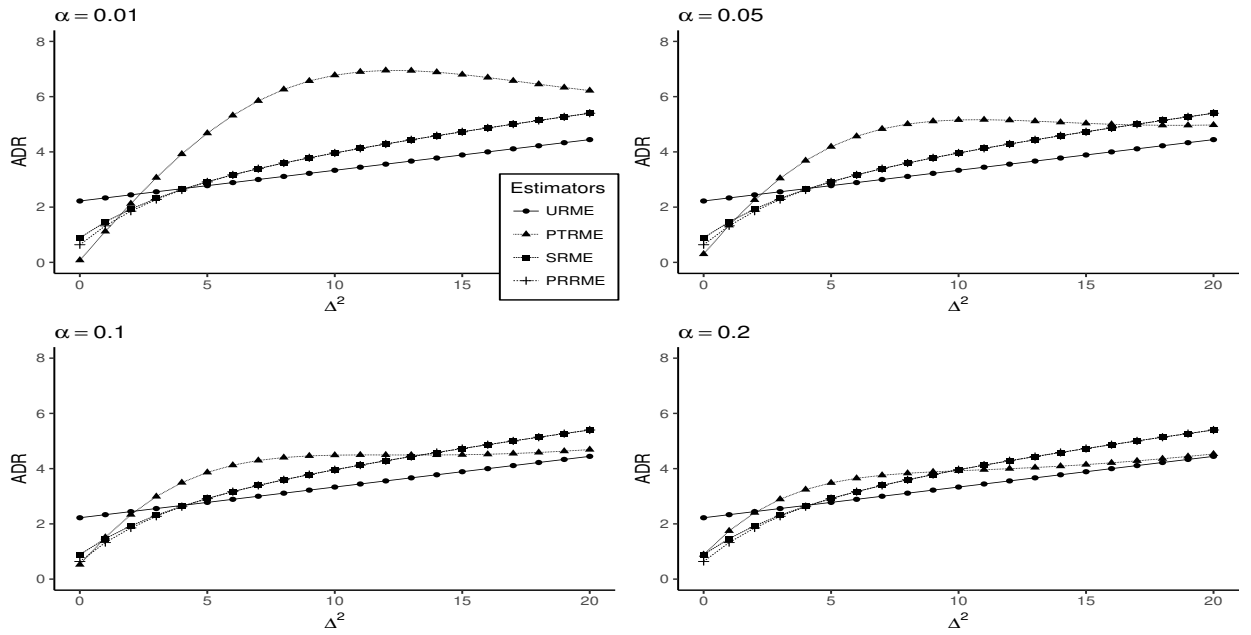

Figure S5: Asymptotic risk behavior of the estimators for  $p = 5$ ,  $k = 0.5$ ,  $\eta^2 = 1$ , and different  $\alpha$ .

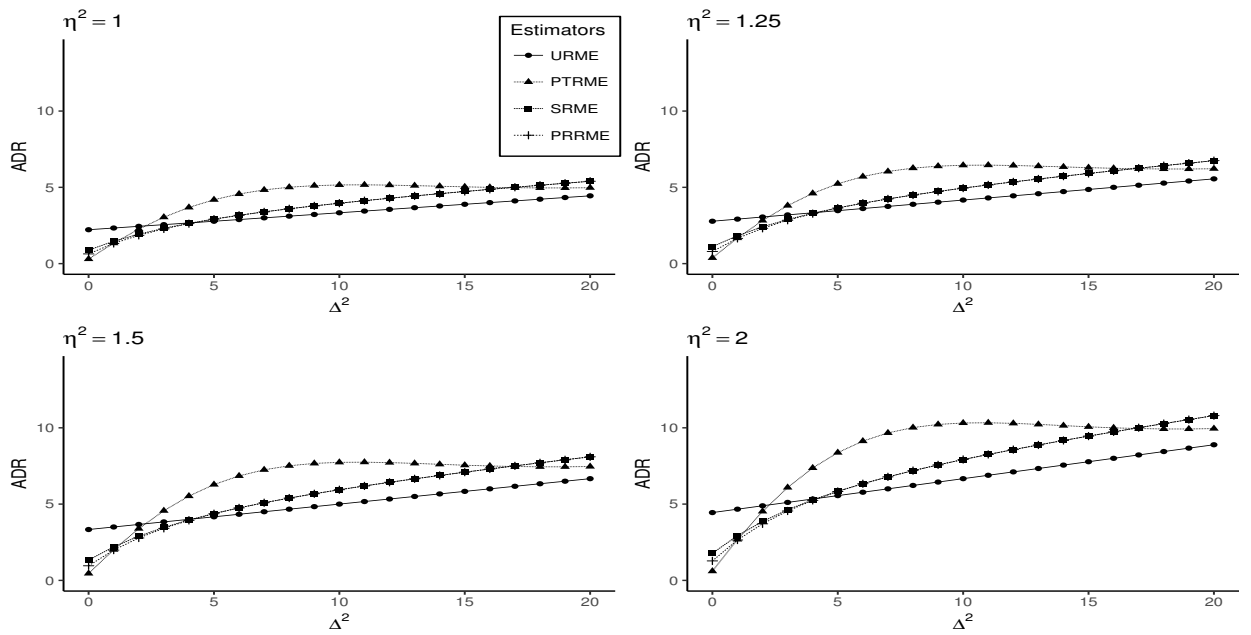

Figure S6: Asymptotic risk behavior of the estimators for  $p = 5$ ,  $k = 0.1$ ,  $\alpha = 0.05$ , and different  $\eta^2$ .

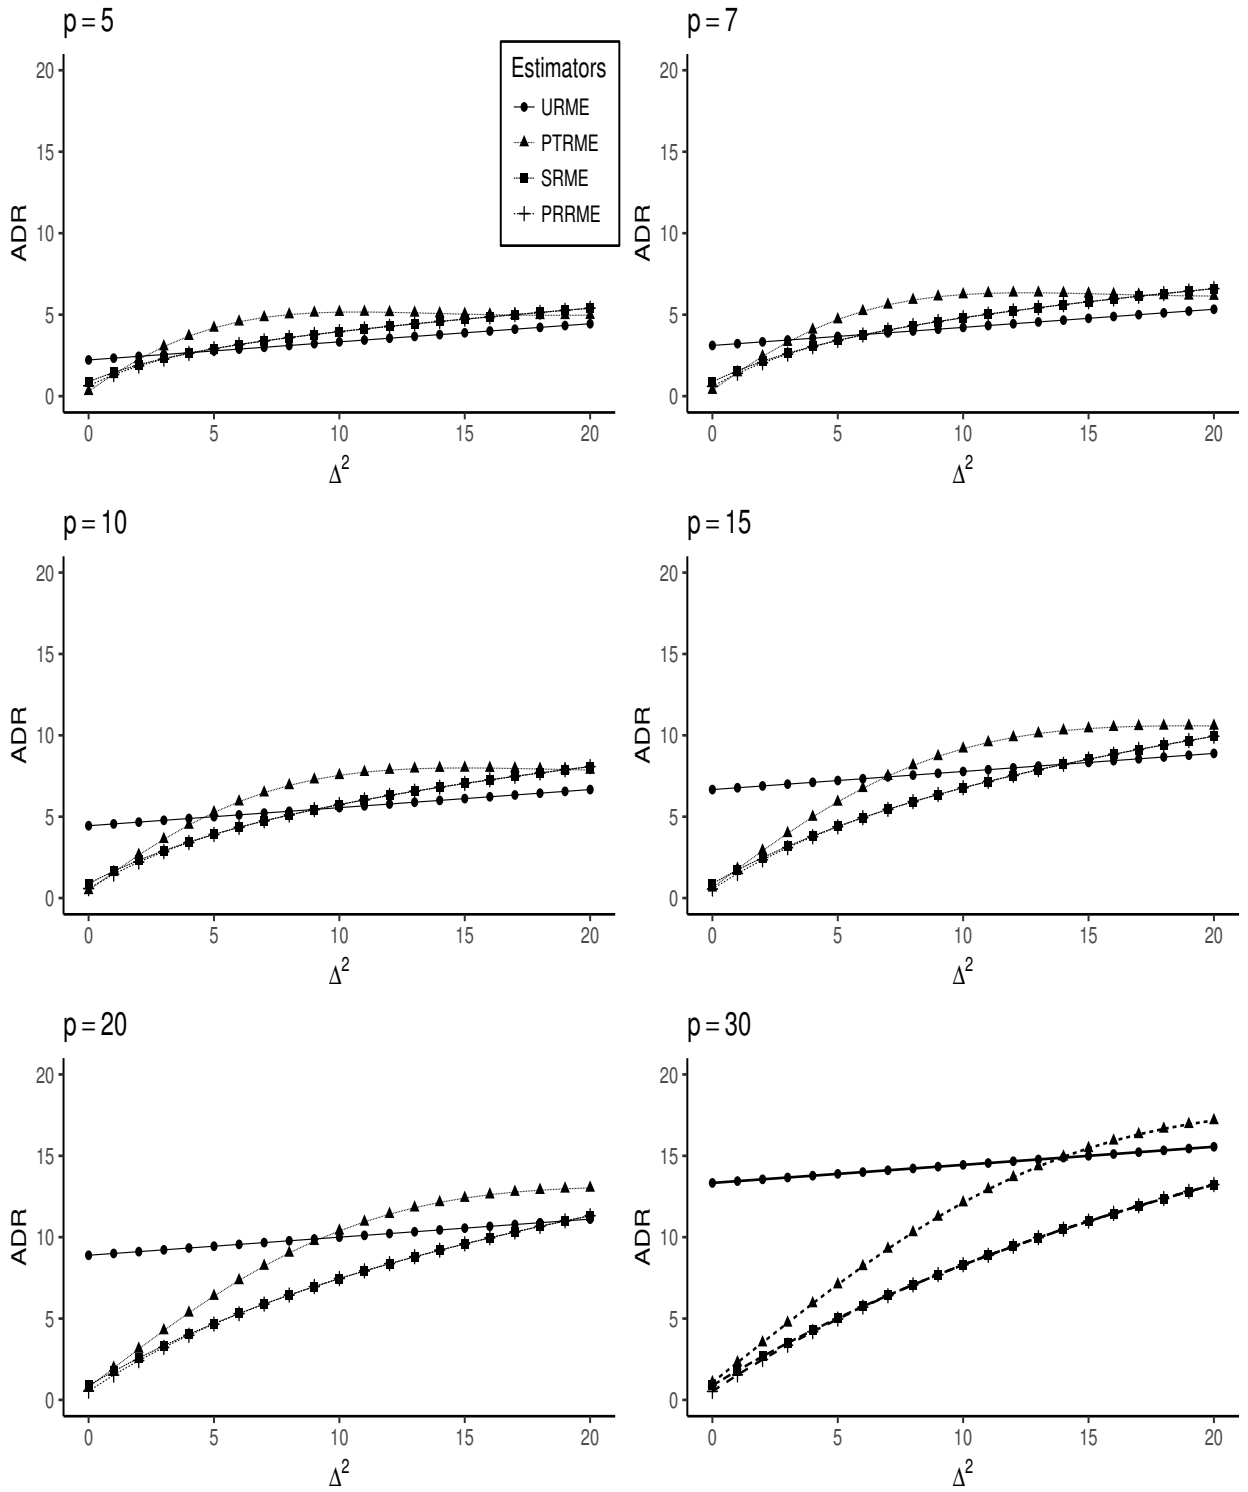

Figure S7: Asymptotic risk behavior of the estimators for  $k = 0.5$ ,  $\eta^2 = 1$ ,  $\alpha = 0.05$  and different  $p$ .

Table S1: Relative efficiencies of the estimators compared with URME for  $\eta^2 = 1$ ,  $\alpha = 0.05$  and different  $p$  and  $k$ .

| $k$  | $p$ | Estimators | $\Delta^2$ |        |       |        |        |        |        |        |        |        |
|------|-----|------------|------------|--------|-------|--------|--------|--------|--------|--------|--------|--------|
|      |     |            | 0.000      | 3.333  | 6.667 | 10.000 | 13.333 | 16.667 | 20.000 | 23.333 | 26.667 | 30.000 |
| 0.01 | 5   | PTRME      | 7.376      | 1.107  | 0.769 | 0.720  | 0.755  | 0.819  | 0.883  | 0.932  | 0.964  | 0.982  |
|      |     | SRME       | 2.500      | 1.496  | 1.269 | 1.177  | 1.129  | 1.100  | 1.081  | 1.067  | 1.057  | 1.049  |
|      |     | PRRME      | 3.571      | 1.647  | 1.324 | 1.196  | 1.135  | 1.102  | 1.082  | 1.067  | 1.057  | 1.049  |
|      | 10  | PTRME      | 9.374      | 1.778  | 1.103 | 0.909  | 0.855  | 0.859  | 0.886  | 0.919  | 0.947  | 0.968  |
|      |     | SRME       | 5.000      | 2.431  | 1.844 | 1.589  | 1.448  | 1.359  | 1.299  | 1.255  | 1.221  | 1.195  |
|      |     | PRRME      | 7.951      | 3.134  | 2.100 | 1.685  | 1.484  | 1.373  | 1.304  | 1.257  | 1.222  | 1.196  |
|      | 30  | PTRME      | 12.458     | 3.754  | 2.191 | 1.586  | 1.291  | 1.134  | 1.049  | 1.005  | 0.985  | 0.978  |
|      |     | SRME       | 15.000     | 6.157  | 4.141 | 3.251  | 2.749  | 2.428  | 2.204  | 2.040  | 1.915  | 1.816  |
|      |     | PRRME      | 26.296     | 17.434 | 7.760 | 4.542  | 3.270  | 2.653  | 2.305  | 2.086  | 1.935  | 1.825  |
| 0.1  | 5   | PTRME      | 7.376      | 1.023  | 0.720 | 0.685  | 0.729  | 0.801  | 0.872  | 0.926  | 0.961  | 0.981  |
|      |     | SRME       | 2.500      | 1.393  | 1.165 | 1.075  | 1.029  | 1.001  | 0.983  | 0.971  | 0.961  | 0.954  |
|      |     | PRRME      | 3.571      | 1.528  | 1.214 | 1.092  | 1.034  | 1.003  | 0.983  | 0.971  | 0.961  | 0.954  |
|      | 10  | PTRME      | 9.374      | 1.647  | 1.031 | 0.861  | 0.820  | 0.833  | 0.868  | 0.907  | 0.940  | 0.965  |
|      |     | SRME       | 5.000      | 2.220  | 1.652 | 1.412  | 1.282  | 1.201  | 1.145  | 1.106  | 1.076  | 1.052  |
|      |     | PRRME      | 7.951      | 2.807  | 1.865 | 1.492  | 1.312  | 1.212  | 1.150  | 1.107  | 1.076  | 1.052  |
|      | 30  | PTRME      | 12.458     | 3.523  | 2.056 | 1.498  | 1.230  | 1.090  | 1.016  | 0.981  | 0.967  | 0.965  |
|      |     | SRME       | 15.000     | 5.549  | 3.651 | 2.839  | 2.388  | 2.102  | 1.904  | 1.760  | 1.650  | 1.563  |
|      |     | PRRME      | 26.296     | 13.479 | 6.307 | 3.821  | 2.791  | 2.278  | 1.983  | 1.796  | 1.666  | 1.570  |
| 1    | 5   | PTRME      | 7.376      | 0.699  | 0.638 | 0.704  | 0.796  | 0.878  | 0.935  | 0.968  | 0.986  | 0.994  |
|      |     | SRME       | 2.500      | 0.898  | 0.812 | 0.806  | 0.816  | 0.828  | 0.841  | 0.853  | 0.863  | 0.872  |
|      |     | PRRME      | 3.571      | 0.941  | 0.828 | 0.811  | 0.817  | 0.829  | 0.841  | 0.853  | 0.863  | 0.872  |
|      | 10  | PTRME      | 9.373      | 0.972  | 0.734 | 0.714  | 0.756  | 0.818  | 0.878  | 0.926  | 0.958  | 0.978  |
|      |     | SRME       | 5.000      | 1.155  | 0.890 | 0.812  | 0.784  | 0.775  | 0.774  | 0.777  | 0.782  | 0.789  |
|      |     | PRRME      | 7.951      | 1.285  | 0.942 | 0.833  | 0.792  | 0.778  | 0.775  | 0.778  | 0.782  | 0.789  |
|      | 30  | PTRME      | 12.485     | 1.980  | 1.226 | 0.981  | 0.884  | 0.850  | 0.850  | 0.867  | 0.892  | 0.918  |
|      |     | SRME       | 15.000     | 2.419  | 1.522 | 1.203  | 1.043  | 0.950  | 0.891  | 0.851  | 0.823  | 0.803  |
|      |     | PRRME      | 26.296     | 3.245  | 1.859 | 1.355  | 1.114  | 0.984  | 0.910  | 0.858  | 0.826  | 0.805  |
| 10   | 5   | PTRME      | 7.376      | 0.893  | 0.927 | 0.956  | 0.976  | 0.988  | 0.994  | 0.997  | 0.999  | 0.999  |
|      |     | SRME       | 2.500      | 0.932  | 0.947 | 0.959  | 0.966  | 0.971  | 0.975  | 0.978  | 0.980  | 0.982  |
|      |     | PRRME      | 3.571      | 0.936  | 0.950 | 0.959  | 0.966  | 0.971  | 0.975  | 0.978  | 0.980  | 0.982  |
|      | 10  | PTRME      | 9.374      | 0.887  | 0.907 | 0.934  | 0.957  | 0.974  | 0.985  | 0.992  | 0.995  | 0.998  |
|      |     | SRME       | 5.000      | 0.906  | 0.915 | 0.926  | 0.935  | 0.942  | 0.948  | 0.953  | 0.957  | 0.961  |
|      |     | PRRME      | 7.951      | 0.915  | 0.921 | 0.929  | 0.936  | 0.943  | 0.948  | 0.953  | 0.957  | 0.961  |
|      | 30  | PTRME      | 12.458     | 0.915  | 0.897 | 0.905  | 0.920  | 0.936  | 0.952  | 0.966  | 0.976  | 0.984  |
|      |     | SRME       | 15.000     | 0.921  | 0.897 | 0.895  | 0.898  | 0.901  | 0.906  | 0.910  | 0.914  | 0.918  |
|      |     | PRRME      | 26.296     | 0.937  | 0.913 | 0.906  | 0.904  | 0.905  | 0.908  | 0.911  | 0.914  | 0.918  |

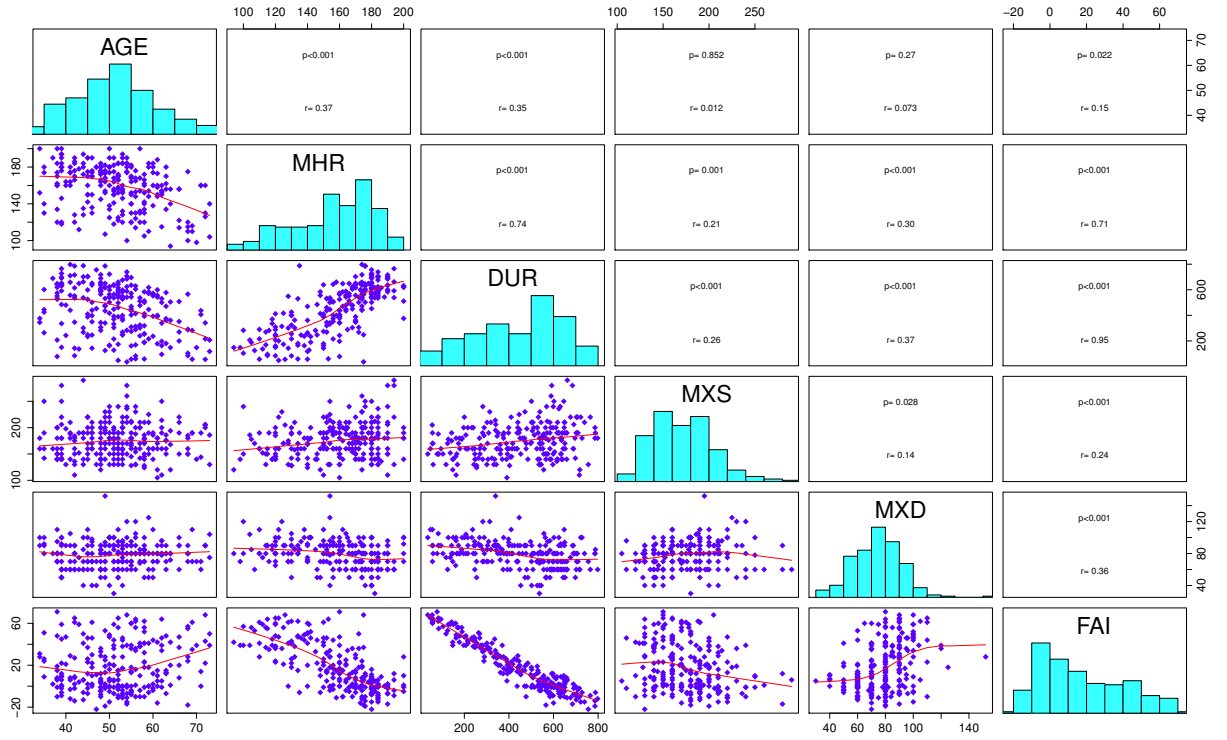

Figure S8: The scatter plot for independent variables of V02 data sets

## S4 More Details on Simulation Studies

Some other tables (Tables S2-S7) for showing the effect of  $\rho^2$  and  $\Delta^2$  on the number of parameters and sample size.

## S5 More Details on Applications

In this section, we show that the used datasets violate two assumptions of multicollinearity and non-normal errors which means there are some outliers.

### S5.1 V02 Dataset

Table S8 shows data summary while visual correlation matrix for the predictors is shown in Figure S8.

From Figure S10, we may guess the existence of multicollinearity. VIF values are shown in Table S11.

The values of Table S9 and  $\kappa = 3451.728$  shows that there is a multicollinearity between independent variables.

Table S2: The relative efficiencies for the proposed estimators in case of  $n = 20$ ,  $p = 5$ , and  $\alpha = 0.05$

| $\rho^2$ | $\Delta^2$ | No Outliers |      |        |       |      |       |      |      |        |       | 10% Outliers |       |      |      |         |       |      |       |      |         | 20% Outliers |       |      |       |  |  |  |  |  |  |
|----------|------------|-------------|------|--------|-------|------|-------|------|------|--------|-------|--------------|-------|------|------|---------|-------|------|-------|------|---------|--------------|-------|------|-------|--|--|--|--|--|--|
|          |            | OLS         | M    | RRME   | PTRME | SRME | RPRME | OLS  | M    | RRME   | PTRME | SRME         | RPRME | OLS  | M    | RRME    | PTRME | SRME | RPRME | OLS  | M       | RRME         | PTRME | SRME | RPRME |  |  |  |  |  |  |
| 0        | 0          | 1.07        | 1.00 | 1.00   | 3.36  | 2.03 | 2.72  | 0.21 | 1.00 | ∞      | 6.88  | 2.10         | 3.75  | 0.26 | 1.00 | ∞       | 16.54 | 2.36 | 0.26  | 1.00 | Inf     | 12.19        | 2.68  | 4.21 |       |  |  |  |  |  |  |
|          | 0.01       | 1.06        | 1.00 | 100.78 | 3.28  | 1.90 | 2.64  | 0.19 | 1.00 | 200.90 | 5.18  | 2.18         | 3.36  | 0.27 | 1.00 | 200.90  | 15.32 | 2.15 | 0.27  | 1.00 | 527.77  | 14.01        | 2.92  | 4.27 |       |  |  |  |  |  |  |
|          | 0.1        | 1.07        | 1.00 | 9.72   | 1.98  | 1.90 | 2.12  | 0.20 | 1.00 | 20.38  | 3.78  | 2.30         | 2.92  | 0.28 | 1.00 | 55.25   | 9.42  | 2.29 | 0.28  | 1.00 | 57.55   | 9.42         | 2.29  | 4.27 |       |  |  |  |  |  |  |
|          | 0.5        | 1.07        | 1.00 | 1.96   | 0.98  | 1.43 | 1.45  | 0.21 | 1.00 | 4.32   | 1.67  | 1.91         | 2.00  | 0.28 | 1.00 | 10.85   | 3.38  | 2.17 | 0.28  | 1.00 | 10.85   | 3.38         | 2.17  | 2.73 |       |  |  |  |  |  |  |
|          | 1          | 1.07        | 1.00 | 1.00   | 1.00  | 1.28 | 1.28  | 1.19 | 0.21 | 1.00   | 2.16  | 1.20         | 1.63  | 1.67 | 1.00 | 2.67    | 2.30  | 1.96 | 0.28  | 1.00 | 5.67    | 2.30         | 1.96  | 2.30 |       |  |  |  |  |  |  |
|          | 2          | 1.07        | 1.00 | 0.50   | 0.94  | 1.19 | 1.19  | 1.19 | 0.20 | 1.00   | 1.00  | 0.98         | 1.40  | 1.40 | 1.00 | 1.40    | 1.40  | 1.48 | 1.00  | 1.00 | 2.68    | 1.48         | 1.83  | 1.83 |       |  |  |  |  |  |  |
|          | 5          | 1.07        | 1.00 | 0.20   | 1.00  | 1.13 | 1.13  | 1.13 | 0.20 | 1.00   | 0.42  | 0.96         | 1.27  | 1.27 | 1.00 | 1.10    | 1.14  | 1.55 | 1.00  | 1.00 | 1.14    | 1.14         | 1.55  | 1.55 |       |  |  |  |  |  |  |
|          | 10         | 1.07        | 1.00 | 0.10   | 1.00  | 1.08 | 1.08  | 1.08 | 0.20 | 1.00   | 0.21  | 0.96         | 1.18  | 1.18 | 1.00 | 0.54    | 0.95  | 1.38 | 1.00  | 1.00 | 0.54    | 0.95         | 1.38  | 1.38 |       |  |  |  |  |  |  |
|          | 20         | 1.06        | 1.00 | 0.05   | 1.00  | 1.03 | 1.03  | 1.03 | 0.20 | 1.00   | 0.10  | 0.96         | 1.11  | 1.11 | 1.00 | 0.25    | 0.89  | 1.26 | 1.00  | 1.00 | 0.25    | 0.89         | 1.26  | 1.26 |       |  |  |  |  |  |  |
|          | 30         | 1.07        | 1.00 | 0.03   | 1.00  | 0.99 | 0.99  | 0.99 | 0.19 | 1.00   | 0.07  | 0.94         | 1.04  | 1.04 | 1.00 | 0.18    | 0.87  | 1.21 | 1.00  | 1.00 | 0.18    | 0.87         | 1.21  | 1.21 |       |  |  |  |  |  |  |
| 0.5      | 0          | 0.01        | 0.01 | ∞      | 1.75  | 1.86 | 1.87  | 0.01 | 0.05 | ∞      | 7.30  | 1.74         | 4.00  | 0.02 | 0.09 | ∞       | 12.19 | 2.68 | 0.02  | 0.09 | Inf     | 12.19        | 2.68  | 4.21 |       |  |  |  |  |  |  |
|          | 0.01       | 0.02        | 0.02 | 2.91   | 1.34  | 1.45 | 1.46  | 0.01 | 0.05 | 17.54  | 3.41  | 2.47         | 2.60  | 0.03 | 0.10 | 83.30   | 14.01 | 2.92 | 0.03  | 0.10 | 83.30   | 14.01        | 2.92  | 4.27 |       |  |  |  |  |  |  |
|          | 0.1        | 0.07        | 0.06 | 0.99   | 0.94  | 1.02 | 1.02  | 0.01 | 0.07 | 2.20   | 1.80  | 1.54         | 1.73  | 0.03 | 0.11 | 9.85    | 5.99  | 2.90 | 0.03  | 0.11 | 9.85    | 5.99         | 2.90  | 3.28 |       |  |  |  |  |  |  |
|          | 0.5        | 0.25        | 0.24 | 0.76   | 0.91  | 0.95 | 0.95  | 0.03 | 0.15 | 1.07   | 1.08  | 1.15         | 1.15  | 0.04 | 0.14 | 2.47    | 2.01  | 1.77 | 0.04  | 0.14 | 2.47    | 2.01         | 1.77  | 1.82 |       |  |  |  |  |  |  |
|          | 1          | 0.44        | 0.42 | 0.68   | 0.85  | 0.95 | 0.95  | 0.05 | 0.23 | 0.82   | 0.99  | 0.92         | 1.04  | 0.05 | 0.17 | 1.60    | 1.53  | 1.47 | 0.05  | 0.17 | 1.60    | 1.53         | 1.47  | 1.49 |       |  |  |  |  |  |  |
|          | 2          | 0.75        | 0.71 | 0.56   | 0.99  | 0.94 | 0.94  | 0.08 | 0.40 | 0.64   | 0.94  | 0.97         | 0.97  | 0.06 | 0.23 | 0.99    | 1.09  | 1.19 | 0.06  | 0.23 | 0.99    | 1.09         | 1.19  | 1.19 |       |  |  |  |  |  |  |
|          | 5          | 1.24        | 1.16 | 0.38   | 1.00  | 0.92 | 0.92  | 0.13 | 0.66 | 0.45   | 0.97  | 0.93         | 0.93  | 0.10 | 0.35 | 0.63    | 1.00  | 1.05 | 0.10  | 0.35 | 0.63    | 1.00         | 1.05  | 1.05 |       |  |  |  |  |  |  |
|          | 10         | 1.61        | 1.50 | 0.24   | 1.00  | 0.89 | 0.89  | 0.18 | 0.89 | 0.30   | 0.97  | 0.90         | 0.90  | 0.13 | 0.50 | 0.42    | 0.92  | 0.96 | 0.13  | 0.50 | 0.42    | 0.92         | 0.96  | 0.96 |       |  |  |  |  |  |  |
|          | 20         | 1.81        | 1.69 | 0.14   | 1.00  | 0.85 | 0.85  | 0.21 | 1.06 | 0.18   | 0.97  | 0.84         | 0.84  | 0.17 | 0.65 | 0.27    | 0.89  | 0.89 | 0.17  | 0.65 | 0.27    | 0.89         | 0.89  | 0.89 |       |  |  |  |  |  |  |
|          | 30         | 1.80        | 1.69 | 0.09   | 1.00  | 0.82 | 0.82  | 0.23 | 1.17 | 0.13   | 0.98  | 0.81         | 0.81  | 0.19 | 0.70 | 0.20    | 0.88  | 0.86 | 0.19  | 0.70 | 0.20    | 0.88         | 0.86  | 0.86 |       |  |  |  |  |  |  |
| 0.8      | 0          | 0.01        | 0.01 | ∞      | 1.81  | 1.89 | 1.91  | 0.01 | 0.04 | ∞      | 7.78  | 2.79         | 4.05  | 0.02 | 0.08 | ∞       | 12.02 | 2.91 | 0.02  | 0.08 | ∞       | 12.02        | 2.91  | 4.11 |       |  |  |  |  |  |  |
|          | 0.01       | 0.02        | 0.01 | 5.70   | 1.52  | 1.64 | 1.66  | 0.01 | 0.05 | 40.68  | 2.86  | 2.57         | 2.74  | 0.03 | 0.09 | 196.86  | 16.77 | 2.73 | 0.03  | 0.09 | 196.86  | 16.77        | 2.73  | 4.29 |       |  |  |  |  |  |  |
|          | 0.1        | 0.03        | 0.03 | 1.21   | 0.99  | 1.11 | 1.11  | 0.01 | 0.05 | 4.05   | 2.51  | 1.80         | 2.21  | 0.03 | 0.10 | 22.08   | 8.30  | 3.25 | 0.03  | 0.10 | 22.08   | 8.30         | 3.25  | 3.75 |       |  |  |  |  |  |  |
|          | 0.5        | 0.11        | 0.10 | 0.82   | 0.90  | 0.97 | 0.97  | 0.02 | 0.09 | 1.58   | 1.27  | 1.36         | 1.36  | 0.04 | 0.11 | 4.82    | 3.15  | 2.20 | 0.04  | 0.11 | 4.82    | 3.15         | 2.20  | 2.30 |       |  |  |  |  |  |  |
|          | 1          | 0.20        | 0.19 | 0.73   | 0.94  | 0.96 | 0.96  | 0.02 | 0.12 | 1.03   | 1.06  | 1.14         | 1.14  | 0.04 | 0.13 | 2.90    | 2.07  | 1.85 | 0.04  | 0.13 | 2.90    | 2.07         | 1.85  | 1.87 |       |  |  |  |  |  |  |
|          | 2          | 0.36        | 0.33 | 0.65   | 0.98  | 0.96 | 0.96  | 0.04 | 0.20 | 0.78   | 0.97  | 1.00         | 1.02  | 0.04 | 0.15 | 1.58    | 1.35  | 1.42 | 0.04  | 0.15 | 1.58    | 1.35         | 1.42  | 1.43 |       |  |  |  |  |  |  |
|          | 5          | 0.70        | 0.65 | 0.52   | 1.00  | 0.95 | 0.95  | 0.07 | 0.36 | 0.61   | 0.98  | 0.98         | 0.98  | 0.06 | 0.22 | 0.95    | 1.10  | 1.19 | 0.06  | 0.22 | 0.95    | 1.10         | 1.19  | 1.19 |       |  |  |  |  |  |  |
|          | 10         | 1.08        | 1.01 | 0.40   | 1.00  | 0.93 | 0.93  | 0.11 | 0.56 | 0.47   | 0.98  | 0.95         | 0.95  | 0.08 | 0.31 | 0.65    | 0.98  | 1.06 | 0.08  | 0.31 | 0.65    | 0.98         | 1.06  | 1.06 |       |  |  |  |  |  |  |
|          | 20         | 1.46        | 1.37 | 0.27   | 1.00  | 0.90 | 0.90  | 0.16 | 0.78 | 0.32   | 0.97  | 0.91         | 0.91  | 0.11 | 0.44 | 0.44    | 0.93  | 0.97 | 0.11  | 0.44 | 0.44    | 0.93         | 0.97  | 0.97 |       |  |  |  |  |  |  |
|          | 30         | 1.59        | 1.49 | 0.20   | 1.00  | 0.88 | 0.88  | 0.18 | 0.93 | 0.25   | 0.98  | 0.88         | 0.88  | 0.14 | 0.50 | 0.35    | 0.91  | 0.94 | 0.14  | 0.50 | 0.35    | 0.91         | 0.94  | 0.94 |       |  |  |  |  |  |  |
| 0.9      | 0          | 0.01        | 0.01 | ∞      | 1.81  | 1.89 | 1.92  | 0.01 | 0.04 | ∞      | 8.13  | 3.55         | 4.08  | 0.02 | 0.08 | ∞       | 12.28 | 2.91 | 0.02  | 0.08 | ∞       | 12.28        | 2.91  | 4.05 |       |  |  |  |  |  |  |
|          | 0.01       | 0.01        | 0.01 | 9.99   | 1.60  | 1.73 | 1.75  | 0.01 | 0.05 | 78.72  | 2.95  | 2.63         | 2.81  | 0.03 | 0.09 | 384.66  | 18.01 | 2.71 | 0.03  | 0.09 | 384.66  | 18.01        | 2.71  | 4.31 |       |  |  |  |  |  |  |
|          | 0.1        | 0.02        | 0.02 | 1.60   | 1.06  | 1.21 | 1.22  | 0.01 | 0.04 | 7.12   | 3.13  | 2.00         | 2.56  | 0.03 | 0.10 | 42.75   | 11.10 | 3.40 | 0.03  | 0.10 | 42.75   | 11.10        | 3.40  | 3.98 |       |  |  |  |  |  |  |
|          | 0.5        | 0.06        | 0.06 | 0.90   | 0.91  | 1.00 | 1.00  | 0.01 | 0.07 | 2.38   | 1.53  | 1.57         | 1.58  | 0.03 | 0.10 | 8.76    | 4.19  | 2.49 | 0.03  | 0.10 | 8.76    | 4.19         | 2.49  | 2.62 |       |  |  |  |  |  |  |
|          | 1          | 0.11        | 0.10 | 0.78   | 0.93  | 0.98 | 0.98  | 0.02 | 0.08 | 1.38   | 1.18  | 1.28         | 1.28  | 0.03 | 0.11 | 5.00    | 2.64  | 2.15 | 0.03  | 0.11 | 5.00    | 2.64         | 2.15  | 2.17 |       |  |  |  |  |  |  |
|          | 2          | 0.19        | 0.18 | 0.70   | 0.97  | 0.97 | 0.97  | 0.02 | 0.12 | 0.94   | 1.01  | 1.09         | 1.09  | 0.03 | 0.12 | 2.50    | 1.64  | 1.65 | 0.03  | 0.12 | 2.50    | 1.64         | 1.65  | 1.66 |       |  |  |  |  |  |  |
|          | 5          | 0.41        | 0.38 | 0.60   | 1.00  | 0.96 | 0.96  | 0.05 | 0.22 | 0.74   | 1.00  | 1.03         | 1.03  | 0.04 | 0.16 | 1.39    | 1.25  | 1.34 | 0.04  | 0.16 | 1.39    | 1.25         | 1.34  | 1.35 |       |  |  |  |  |  |  |
|          | 10         | 0.69        | 0.65 | 0.51   | 1.00  | 0.96 | 0.96  | 0.07 | 0.36 | 0.60   | 0.99  | 0.99         | 0.99  | 0.06 | 0.22 | 0.90    | 1.07  | 1.16 | 0.06  | 0.22 | 0.90    | 1.07         | 1.16  | 1.16 |       |  |  |  |  |  |  |
|          | 20         | 1.08        | 1.01 | 0.39   | 1.00  | 0.94 | 0.94  | 0.11 | 0.54 | 0.44   | 0.98  | 0.95         | 0.95  | 0.08 | 0.31 | 0.62    | 0.97  | 1.05 | 0.08  | 0.31 | 0.62    | 0.97         | 1.05  | 1.05 |       |  |  |  |  |  |  |
|          | 30         | 1.27        | 1.19 | 0.31   | 1.00  | 0.92 | 0.92  | 0.14 | 0.70 | 0.37   | 0.99  | 0.93         | 0.93  | 0.10 | 0.36 | 0.51    | 0.96  | 1.01 | 0.10  | 0.36 | 0.51    | 0.96         | 1.01  | 1.01 |       |  |  |  |  |  |  |
| 0.99     | 0          | 0.01        | 0.01 | ∞      | 1.72  | 1.85 | 1.87  | 0.01 | 0.04 | ∞      | 8.53  | 3.59         | 4.24  | 0.02 | 0.08 | ∞       | 13.24 | 2.95 | 0.02  | 0.08 | ∞       | 13.24        | 2.95  | 4.07 |       |  |  |  |  |  |  |
|          | 0.01       | 0.01        | 0.01 | 79.43  | 1.67  | 1.82 | 1.84  | 0.01 | 0.05 | 740.15 | 2.98  | 2.69         | 2.86  | 0.03 | 0.09 | 3678.00 | 20.67 | 2.65 | 0.03  | 0.09 | 3678.00 | 20.67        | 2.65  | 4.28 |       |  |  |  |  |  |  |
|          | 0.1        | 0.01        | 0.01 | 8.11   | 1.36  | 1.59 | 1.60  | 0.01 | 0.04 | 60.92  | 4.69  | 2.37         | 3.16  | 0.03 | 0.09 | 412.51  | 16.55 | 3.55 | 0.03  | 0.09 | 412.51  | 16.55        | 3.55  | 4.24 |       |  |  |  |  |  |  |
|          | 0.5        | 0.02        | 0.02 | 2.35   | 1.05  | 1.25 | 1.26  | 0.01 | 0.05 | 17.03  | 2.37  | 2.13         | 2.15  | 0.03 | 0.09 | 79.76   | 6.71  | 2.92 | 0.03  | 0.09 | 79.76   | 6.71         | 2.92  | 3.09 |       |  |  |  |  |  |  |
|          | 1          | 0.02        | 0.02 | 1.52   | 0.97  | 1.13 | 1.13  | 0.01 | 0.04 | 7.48   | 1.84  | 1.85         | 1.85  | 0.03 | 0.10 | 42.67   | 3.87  | 2.67 | 0.03  | 0.10 | 42.67   | 3.87         | 2.67  | 2.69 |       |  |  |  |  |  |  |
|          | 2          | 0.03        | 0.03 | 1.04   | 0.98  | 1.06 | 1.06  | 0.01 | 0.05 | 3.53   | 1.29  | 1.33         | 1.33  | 0.02 | 0.09 | 18.94   | 2.71  | 2.17 | 0.02  | 0.09 | 18.94   | 2.71         | 2.17  | 2.19 |       |  |  |  |  |  |  |
|          | 5          | 0.06        | 0.05 | 0.82   | 1.00  | 1.01 | 1.01  | 0.01 | 0.06 | 2.12   | 1.12  | 1.33         | 1.33  | 0.03 | 0.10 | 8.49    | 1.78  | 1.82 | 0.03  | 0.10 | 8.49    | 1.78         | 1.82  | 1.82 |       |  |  |  |  |  |  |
|          | 10         | 0.10        | 0.09 | 0.74   | 1.00  | 1.00 | 1.00  | 0.02 | 0.08 | 1.39   | 1.09  | 1.21         | 1.21  | 0.03 | 0.11 | 4.22    | 1.42  | 1.60 | 0.03  | 0.11 | 4.22    | 1.42         | 1.60  | 1.60 |       |  |  |  |  |  |  |
|          | 20         | 0.19        | 0.17 | 0.67   | 1.00  | 0.99 | 0.99  | 0.02 | 0.11 | 0.92   | 1.02  | 1.09         | 1.09  | 0.03 | 0.12 | 2.23    | 1.14  | 1.38 | 0.03  | 0.12 | 2.23    | 1.14         | 1.38  | 1.38 |       |  |  |  |  |  |  |
|          | 30         | 0.26        | 0.24 | 0.63   | 1.00  | 0.99 | 0.99  | 0.03 | 0.15 | 0.81   | 1.00  | 1.06         | 1.06  | 0.03 | 0.12 | 1.75    | 1.09  | 1.31 | 0.03  | 0.12 | 1.75    | 1.09         | 1.31  | 1.31 |       |  |  |  |  |  |  |

Table S3: The relative efficiencies for the proposed estimators in case of  $n = 20$ ,  $p = 10$ , and  $\alpha = 0.1$

| $\rho^2$ | $\Delta^2$ | No. Outliers |      |          |       |      |       |      |       |         |       | 10% Outliers |       |       |         |          |       |       |       |       |      | 20% Outliers |       |      |       |      |       |        |      |      |      |       |         |          |       |       |       |      |       |      |      |      |
|----------|------------|--------------|------|----------|-------|------|-------|------|-------|---------|-------|--------------|-------|-------|---------|----------|-------|-------|-------|-------|------|--------------|-------|------|-------|------|-------|--------|------|------|------|-------|---------|----------|-------|-------|-------|------|-------|------|------|------|
|          |            | OLS          | M    | RRME     | PTRME | SRME | RRPME | OLSR | M     | RRME    | PTRME | SRME         | RRPME | OLSR  | M       | RRME     | PTRME | SRME  | RRPME | OLSR  | M    | RRME         | PTRME | SRME | RRPME |      |       |        |      |      |      |       |         |          |       |       |       |      |       |      |      |      |
| 0        | 0          | 1.10         | 1.00 | 1.00     | 1.70  | 2.62 | 2.74  | 0.39 | 1.00  | 1.00    | 5.31  | 7.17         | 0.53  | 1.00  | 1.00    | $\infty$ | 13.89 | 3.59  | 12.87 | 1.10  | 1.00 | 1.00         | 1.70  | 2.62 | 2.74  | 0.39 | 1.00  | 1.00   | 5.31 | 7.17 | 0.53 | 1.00  | 1.00    | $\infty$ | 13.89 | 3.59  | 12.87 |      |       |      |      |      |
|          | 0.1        | 1.09         | 1.00 | 283.32   | 1.67  | 2.60 | 2.72  | 0.38 | 1.00  | 1056.80 | 5.50  | 6.95         | 0.55  | 1.00  | 1.00    | 2978.21  | 14.74 | 3.87  | 13.22 | 1.09  | 1.00 | 1.00         | 1.67  | 2.60 | 2.72  | 0.38 | 1.00  | 1.00   | 5.50 | 6.95 | 0.55 | 1.00  | 1.00    | 2978.21  | 14.74 | 3.87  | 13.22 |      |       |      |      |      |
|          | 0.5        | 1.10         | 1.00 | 5.59     | 1.11  | 1.81 | 1.83  | 0.39 | 1.00  | 22.02   | 2.94  | 4.28         | 0.53  | 1.00  | 1.00    | 55.94    | 7.07  | 4.61  | 7.29  | 1.10  | 1.00 | 1.00         | 1.11  | 1.81 | 1.83  | 0.39 | 1.00  | 1.00   | 2.94 | 4.28 | 0.53 | 1.00  | 1.00    | 55.94    | 7.07  | 4.61  | 7.29  |      |       |      |      |      |
|          | 1          | 1.09         | 1.00 | 2.84     | 1.01  | 1.56 | 1.57  | 0.38 | 1.00  | 10.93   | 2.22  | 3.40         | 0.54  | 1.00  | 1.00    | 30.02    | 4.50  | 4.63  | 5.37  | 1.09  | 1.00 | 1.00         | 1.01  | 1.56 | 1.57  | 0.38 | 1.00  | 1.00   | 2.22 | 3.40 | 0.54 | 1.00  | 1.00    | 30.02    | 4.50  | 4.63  | 5.37  |      |       |      |      |      |
|          | 5          | 1.10         | 1.00 | 1.41     | 1.09  | 1.39 | 1.39  | 0.36 | 1.00  | 5.17    | 1.65  | 2.48         | 0.53  | 1.00  | 1.00    | 14.22    | 2.78  | 3.64  | 3.77  | 1.10  | 1.00 | 1.00         | 1.09  | 1.39 | 1.39  | 0.36 | 1.00  | 1.00   | 1.65 | 2.48 | 0.53 | 1.00  | 1.00    | 14.22    | 2.78  | 3.64  | 3.77  |      |       |      |      |      |
|          | 10         | 1.09         | 1.00 | 0.56     | 1.00  | 1.25 | 1.25  | 0.39 | 1.00  | 1.26    | 1.26  | 1.98         | 0.55  | 1.00  | 1.00    | 6.10     | 1.81  | 2.83  | 2.83  | 1.09  | 1.00 | 1.00         | 1.00  | 1.25 | 1.25  | 0.39 | 1.00  | 1.00   | 1.26 | 1.26 | 1.98 | 0.55  | 1.00    | 1.00     | 6.10  | 1.81  | 2.83  | 2.83 |       |      |      |      |
|          | 20         | 1.09         | 1.00 | 0.28     | 1.00  | 1.18 | 1.18  | 0.39 | 1.00  | 1.11    | 1.11  | 1.76         | 0.54  | 1.00  | 1.00    | 2.92     | 1.40  | 2.34  | 2.34  | 1.09  | 1.00 | 1.00         | 1.00  | 1.18 | 1.18  | 0.39 | 1.00  | 1.00   | 1.11 | 1.11 | 1.76 | 0.54  | 1.00    | 1.00     | 2.92  | 1.40  | 2.34  | 2.34 |       |      |      |      |
|          | 30         | 1.10         | 1.00 | 0.14     | 1.00  | 1.10 | 1.10  | 0.39 | 1.00  | 0.55    | 1.04  | 1.58         | 0.54  | 1.00  | 1.00    | 1.47     | 1.18  | 2.06  | 2.06  | 1.10  | 1.00 | 1.00         | 1.00  | 1.10 | 1.10  | 0.39 | 1.00  | 1.00   | 0.55 | 1.04 | 1.58 | 0.54  | 1.00    | 1.00     | 1.47  | 1.18  | 2.06  | 2.06 |       |      |      |      |
|          | 0          | 0.03         | 0.03 | $\infty$ | 1.31  | 2.10 | 2.11  | 0.04 | 0.11  | 6.55    | 4.19  | 7.98         | 0.07  | 0.14  | 10.96   | 4.39     | 10.44 | 10.96 | 4.39  | 10.44 | 0.03 | 0.03         | 0.03  | 1.31 | 2.10  | 2.11 | 0.04  | 0.11   | 6.55 | 4.19 | 7.98 | 0.07  | 0.14    | 10.96    | 4.39  | 10.44 | 10.96 | 4.39 | 10.44 |      |      |      |
|          | 0.1        | 0.03         | 0.03 | 13.31    | 1.22  | 1.91 | 1.92  | 0.04 | 0.10  | 177.06  | 6.44  | 4.36         | 0.08  | 0.15  | 753.07  | 8.43     | 9.09  | 8.43  | 9.09  | 0.03  | 0.03 | 0.03         | 1.22  | 1.91 | 1.92  | 0.04 | 0.10  | 177.06 | 6.44 | 4.36 | 0.08 | 0.15  | 753.07  | 8.43     | 9.09  | 8.43  | 9.09  |      |       |      |      |      |
| 0.5      | 0.11       | 0.10         | 0.96 | 1.05     | 1.38  | 1.38 | 0.04  | 0.11 | 20.34 | 4.34    | 3.84  | 0.07         | 0.14  | 70.52 | 9.73    | 5.64     | 9.73  | 5.64  | 0.11  | 0.10  | 0.10 | 1.05         | 1.38  | 1.38 | 0.04  | 0.11 | 20.34 | 4.34   | 3.84 | 0.07 | 0.14 | 70.52 | 9.73    | 5.64     | 9.73  | 5.64  |       |      |       |      |      |      |
| 0.5      | 1          | 0.18         | 0.16 | 0.82     | 0.98  | 1.00 | 0.05  | 0.13 | 2.52  | 1.74    | 2.02  | 0.08         | 0.15  | 7.60  | 3.05    | 3.44     | 3.05  | 3.44  | 0.18  | 0.16  | 0.16 | 0.82         | 0.98  | 1.00 | 0.05  | 0.13 | 2.52  | 1.74   | 2.02 | 0.08 | 0.15 | 7.60  | 3.05    | 3.44     | 3.05  | 3.44  |       |      |       |      |      |      |
|          | 2          | 0.31         | 0.28 | 0.71     | 1.00  | 0.97 | 0.06  | 0.16 | 1.44  | 1.31    | 1.49  | 0.08         | 0.16  | 3.94  | 2.45    | 2.47     | 0.08  | 0.16  | 3.94  | 2.45  | 2.47 | 0.31         | 0.28  | 0.28 | 0.71  | 1.00 | 0.97  | 0.06   | 0.16 | 1.44 | 1.31 | 1.49  | 0.08    | 0.16     | 3.94  | 2.45  | 2.47  | 0.08 | 0.16  | 3.94 | 2.45 | 2.47 |
|          | 5          | 0.63         | 0.57 | 0.57     | 1.00  | 0.95 | 0.95  | 0.09 | 0.25  | 0.94    | 1.08  | 1.21         | 0.11  | 0.20  | 2.05    | 1.43     | 1.81  | 1.43  | 1.81  | 0.63  | 0.57 | 0.57         | 1.00  | 0.95 | 0.95  | 0.09 | 0.25  | 0.94   | 1.08 | 1.21 | 0.11 | 0.20  | 2.05    | 1.43     | 1.81  | 1.43  | 1.81  |      |       |      |      |      |
|          | 10         | 0.98         | 0.89 | 0.45     | 1.00  | 0.93 | 0.93  | 0.14 | 0.36  | 1.04    | 1.09  | 1.15         | 0.13  | 0.25  | 1.27    | 1.09     | 1.47  | 1.09  | 1.47  | 0.98  | 0.89 | 0.89         | 0.45  | 1.00 | 0.93  | 0.93 | 0.14  | 0.36   | 1.04 | 1.09 | 1.15 | 0.13  | 0.25    | 1.27     | 1.09  | 1.47  | 1.09  | 1.47 |       |      |      |      |
|          | 20         | 1.40         | 1.28 | 0.32     | 1.00  | 0.89 | 0.89  | 0.19 | 0.50  | 0.48    | 0.99  | 0.98         | 0.16  | 0.32  | 0.80    | 1.02     | 1.22  | 0.16  | 0.32  | 0.80  | 1.40 | 1.28         | 1.28  | 0.32 | 1.00  | 0.89 | 0.89  | 0.19   | 0.50 | 0.48 | 0.99 | 0.98  | 0.16    | 0.32     | 0.80  | 1.02  | 1.22  | 0.16 | 0.32  | 0.80 |      |      |
|          | 30         | 1.61         | 1.45 | 0.25     | 1.00  | 0.86 | 0.86  | 0.22 | 0.62  | 0.37    | 0.97  | 0.92         | 0.20  | 0.38  | 0.63    | 0.94     | 1.12  | 0.20  | 0.38  | 0.63  | 1.61 | 1.45         | 1.45  | 0.25 | 1.00  | 0.86 | 0.86  | 0.22   | 0.62 | 0.37 | 0.97 | 0.92  | 0.20    | 0.38     | 0.63  | 0.94  | 1.12  | 0.20 | 0.38  | 0.63 |      |      |
|          | 0          | 0.03         | 0.03 | $\infty$ | 1.30  | 2.04 | 2.04  | 0.04 | 0.10  | 6.46    | 4.22  | 8.13         | 0.07  | 0.14  | 11.28   | 4.49     | 10.49 | 11.28 | 4.49  | 10.49 | 0.03 | 0.03         | 0.03  | 1.30 | 2.04  | 2.04 | 0.04  | 0.10   | 6.46 | 4.22 | 8.13 | 0.07  | 0.14    | 11.28    | 4.49  | 10.49 | 11.28 | 4.49 | 10.49 |      |      |      |
|          | 0.1        | 0.03         | 0.02 | 30.64    | 1.26  | 2.01 | 2.01  | 0.04 | 0.10  | 437.64  | 6.68  | 4.39         | 0.08  | 0.14  | 1831.16 | 9.34     | 9.41  | 9.34  | 9.41  | 0.03  | 0.02 | 0.02         | 1.26  | 2.01 | 2.01  | 0.04 | 0.10  | 437.64 | 6.68 | 4.39 | 0.08 | 0.14  | 1831.16 | 9.34     | 9.41  | 9.34  | 9.41  |      |       |      |      |      |
|          | 0.5        | 0.06         | 0.05 | 1.31     | 1.09  | 1.60 | 1.60  | 0.04 | 0.10  | 49.14   | 4.38  | 4.28         | 0.07  | 0.14  | 172.86  | 9.53     | 6.01  | 9.53  | 6.01  | 0.06  | 0.05 | 0.05         | 1.09  | 1.60 | 1.60  | 0.04 | 0.10  | 49.14  | 4.38 | 4.28 | 0.07 | 0.14  | 172.86  | 9.53     | 6.01  | 9.53  | 6.01  |      |       |      |      |      |
|          | 0.8        | 1            | 0.09 | 0.08     | 1.02  | 0.99 | 1.07  | 0.04 | 0.11  | 5.26    | 2.03  | 2.61         | 0.07  | 0.14  | 18.02   | 3.42     | 3.88  | 3.42  | 3.88  | 0.09  | 0.08 | 0.08         | 1.02  | 0.99 | 1.07  | 0.04 | 0.11  | 5.26   | 2.03 | 2.61 | 0.07 | 0.14  | 18.02   | 3.42     | 3.88  | 3.42  | 3.88  |      |       |      |      |      |
| 2        |            | 0.15         | 0.13 | 0.84     | 1.00  | 1.01 | 0.04  | 0.12 | 2.61  | 1.57    | 1.90  | 0.07         | 0.14  | 8.81  | 2.40    | 3.08     | 2.40  | 3.08  | 0.15  | 0.13  | 0.13 | 0.84         | 1.00  | 1.01 | 0.04  | 0.12 | 2.61  | 1.57   | 1.90 | 0.07 | 0.14 | 8.81  | 2.40    | 3.08     | 2.40  | 3.08  |       |      |       |      |      |      |
| 5        |            | 0.31         | 0.28 | 0.69     | 1.00  | 0.98 | 0.98  | 0.06 | 0.17  | 1.54    | 1.19  | 1.47         | 0.09  | 0.17  | 4.24    | 1.69     | 2.28  | 1.69  | 2.28  | 0.31  | 0.28 | 0.28         | 0.69  | 1.00 | 0.98  | 0.98 | 0.06  | 0.17   | 1.54 | 1.19 | 1.47 | 0.09  | 0.17    | 4.24     | 1.69  | 2.28  | 1.69  | 2.28 |       |      |      |      |
| 10       |            | 0.52         | 0.47 | 0.59     | 1.00  | 0.96 | 0.96  | 0.08 | 0.23  | 1.08    | 1.12  | 1.29         | 0.10  | 0.19  | 2.43    | 1.41     | 1.87  | 1.41  | 1.87  | 0.52  | 0.47 | 0.47         | 0.59  | 1.00 | 0.96  | 0.96 | 0.08  | 0.23   | 1.08 | 1.12 | 1.29 | 0.10  | 0.19    | 2.43     | 1.41  | 1.87  | 1.41  | 1.87 |       |      |      |      |
| 20       |            | 0.84         | 0.76 | 0.48     | 1.00  | 0.94 | 0.94  | 0.12 | 0.31  | 0.74    | 1.03  | 1.12         | 0.12  | 0.22  | 1.39    | 1.22     | 1.52  | 0.12  | 0.22  | 1.39  | 0.84 | 0.76         | 0.76  | 0.48 | 1.00  | 0.94 | 0.94  | 0.12   | 0.31 | 0.74 | 1.03 | 1.12  | 1.52    | 1.39     | 1.22  | 1.52  | 1.39  | 1.22 | 1.52  | 1.39 | 1.22 | 1.52 |
| 30       |            | 1.07         | 0.96 | 0.41     | 1.00  | 0.92 | 0.92  | 0.14 | 0.40  | 0.59    | 1.02  | 1.04         | 0.14  | 0.26  | 1.08    | 1.10     | 1.38  | 0.14  | 0.26  | 1.08  | 1.07 | 0.96         | 0.96  | 0.41 | 1.00  | 0.92 | 0.92  | 0.14   | 0.40 | 0.59 | 1.02 | 1.04  | 1.38    | 1.10     | 1.08  | 1.10  | 1.38  | 1.10 | 1.08  | 1.10 | 1.38 |      |
| 0        |            | 0.03         | 0.02 | $\infty$ | 1.30  | 2.08 | 2.08  | 0.04 | 0.10  | 6.67    | 4.27  | 8.33         | 0.07  | 0.14  | 11.09   | 4.52     | 10.66 | 11.09 | 4.52  | 10.66 | 0.03 | 0.02         | 0.02  | 1.30 | 2.08  | 2.08 | 0.04  | 0.10   | 6.67 | 4.27 | 8.33 | 0.07  | 0.14    | 11.09    | 4.52  | 10.66 | 11.09 | 4.52 | 10.66 |      |      |      |
| 0.1      |            | 0.03         | 0.02 | 59.22    | 1.26  | 2.03 | 2.03  | 0.04 | 0.10  | 875.61  | 6.86  | 4.42         | 0.08  | 0.14  | 3625.13 | 9.85     | 4.04  | 9.85  | 4.04  | 0.03  | 0.02 | 0.02         | 1.26  | 2.03 | 2.03  | 0.04 | 0.10  | 875.61 | 6.86 | 4.42 | 0.08 | 0.14  | 3625.13 | 9.85     | 4.04  | 9.85  | 4.04  |      |       |      |      |      |
| 0.5      |            | 0.04         | 0.04 | 6.84     | 1.12  | 1.74 | 1.74  | 0.04 | 0.10  | 97.33   | 4.55  | 4.45         | 0.07  | 0.14  | 340.63  | 9.17     | 6.10  | 9.17  | 6.10  | 0.04  | 0.04 | 0.04         | 1.12  | 1.74 | 1.74  | 0.04 | 0.10  | 97.33  | 4.55 | 4.45 | 0.07 | 0.14  | 340.63  | 9.17     | 6.10  | 9.17  | 6.10  |      |       |      |      |      |
| 0.9      |            | 1            | 0.06 | 0.05     | 1.33  | 0.99 | 1.14  | 0.04 | 0.10  | 20.64   | 2.98  | 3.55         | 0.07  | 0.13  | 62.26   | 5.35     | 5.29  | 5.35  | 5.29  | 0.06  | 0.05 | 0.05         | 1.33  | 0.99 | 1.14  | 0.04 | 0.10  | 20.64  | 2.98 | 3.55 | 0.07 | 0.13  | 62.26   | 5.35     | 5.29  | 5.35  | 5.29  |      |       |      |      |      |
|          | 2          | 0.09         | 0.08 | 1.00     | 1.00  | 1.06 | 0.04  | 0.10 | 4.52  | 1.72    | 2.22  | 0.07         | 0.14  | 16.85 | 2.51    | 3.34     | 2.51  | 3.34  | 0.09  | 0.08  | 0.08 | 1.00         | 1.00  | 1.06 | 0.04  | 0.10 | 4.52  | 1.72   | 2.22 | 0.07 | 0.14 | 16.85 | 2.51    | 3.34     | 2.51  | 3.34  |       |      |       |      |      |      |
|          | 5          | 0.17         | 0.16 | 0.78     | 1.00  | 1.01 | 1.01  | 0.05 | 0.13  | 2.48    | 1.28  | 1.71         | 0.08  | 0.15  | 7.80    | 1.86     | 2.58  | 1.86  | 2.58  | 0.17  | 0.16 | 0.16         | 0.78  | 1.00 | 1.01  | 1.01 | 0.05  | 0.13   | 2.48 | 1.28 | 1.71 | 0.08  | 0.15    | 7.80     | 1.86  | 2.58  | 1.86  | 2.58 |       |      |      |      |
|          | 10         | 0.30         | 0.27 | 0.69     | 1.00  | 0.98 | 0.98  | 0.06 | 0.17  | 1.61    | 1.19  | 1.48         | 0.09  | 0.17  | 4.28    | 1.56     | 2.17  | 1.56  | 2.17  | 0.30  | 0.27 | 0.27         | 0.69  | 1.00 | 0.98  | 0.98 | 0.06  | 0.17   | 1.61 | 1.19 | 1.48 | 0.09  | 0.17    | 4.28     | 1.56  | 2.17  | 1.56  | 2.17 |       |      |      |      |
|          | 20         | 0.52         | 0.47 | 0.59     | 1.00  | 0.97 | 0.97  | 0.08 | 0.22  | 1.04    | 1.09  | 1.26         | 0.09  | 0.18  | 2.29    | 1.37     | 1.80  | 1.37  | 1.80  | 0.52  | 0.47 | 0.47         | 0.59  | 1.00 | 0.97  | 0.97 | 0.08  | 0.22   | 1.04 | 1.09 | 1.26 | 0.09  | 0.18    | 2.29     | 1.37  | 1.80  |       |      |       |      |      |      |





Table S5: The relative efficiencies for the proposed estimators in case of  $n = 50$ ,  $p = 10$ , and  $\alpha = 0.05$

| $\rho^2$ | $\Delta^2$ | No. Outliers |      |       |       |      |       |      |      |       |       | 10% Outliers |       |      |      |        |       |      |       |      |        | 20% Outliers |       |      |       |        |       |        |      |      |      |
|----------|------------|--------------|------|-------|-------|------|-------|------|------|-------|-------|--------------|-------|------|------|--------|-------|------|-------|------|--------|--------------|-------|------|-------|--------|-------|--------|------|------|------|
|          |            | OLS          | M    | RRME  | PTRME | SRME | RPRME | OLS  | M    | RRME  | PTRME | SRME         | PRRME | OLS  | M    | RRME   | PTRME | SRME | PRRME | OLS  | M      | RRME         | PTRME | SRME | PRRME |        |       |        |      |      |      |
| 0        | 0          | 1.07         | 1.00 | ∞     | 4.10  | 4.16 | 5.18  | 0.16 | 1.00 | ∞     | 6.09  | 6.51         | 0.17  | 1.00 | Inf  | 12.96  | 5.65  | 9.37 | 0.17  | 1.00 | ∞      | 6.09         | 6.51  | 0.17 | 1.00  | Inf    | 12.96 | 5.65   | 9.37 |      |      |
|          | 0.1        | 1.07         | 1.00 | 55.39 | 3.21  | 3.88 | 4.48  | 0.16 | 1.00 | 92.13 | 4.88  | 4.51         | 5.79  | 0.18 | 1.00 | 193.39 | 10.15 | 8.36 | 0.18  | 1.00 | 193.39 | 10.15        | 8.36  | 0.18 | 1.00  | 193.39 | 10.15 | 8.36   |      |      |      |
|          | 0.5        | 1.06         | 1.00 | 1.12  | 0.99  | 1.45 | 1.45  | 0.15 | 1.00 | 0.92  | 1.96  | 3.02         | 3.21  | 0.17 | 1.00 | 19.24  | 3.61  | 4.06 | 0.17  | 1.00 | 3.72   | 1.72         | 1.72  | 1.72 | 1.00  | 3.72   | 1.72  | 2.29   | 2.30 |      |      |
|          | 1          | 1.07         | 1.00 | 0.56  | 1.00  | 1.29 | 1.45  | 0.16 | 1.00 | 1.81  | 0.99  | 1.45         | 1.45  | 0.17 | 1.00 | 1.86   | 1.03  | 1.80 | 0.17  | 1.00 | 1.86   | 1.03         | 1.80  | 1.03 | 1.00  | 1.86   | 1.03  | 1.80   | 1.80 |      |      |
|          | 2          | 1.06         | 1.00 | 0.28  | 1.00  | 1.19 | 1.19  | 0.16 | 1.00 | 0.46  | 1.00  | 1.30         | 1.30  | 0.17 | 1.00 | 0.96   | 1.00  | 1.55 | 0.17  | 1.00 | 0.96   | 1.00         | 1.55  | 1.00 | 1.00  | 0.96   | 1.00  | 1.55   | 1.55 |      |      |
|          | 5          | 1.07         | 1.00 | 0.11  | 1.00  | 1.10 | 1.10  | 0.16 | 1.00 | 0.19  | 1.00  | 1.16         | 1.16  | 0.17 | 1.00 | 0.38   | 1.00  | 1.33 | 0.17  | 1.00 | 0.38   | 1.00         | 1.33  | 1.00 | 1.00  | 0.38   | 1.00  | 1.33   | 1.33 |      |      |
|          | 10         | 1.06         | 1.00 | 0.06  | 1.00  | 1.03 | 1.03  | 0.16 | 1.00 | 0.09  | 1.00  | 1.07         | 1.07  | 0.17 | 1.00 | 0.19   | 1.00  | 1.19 | 0.17  | 1.00 | 0.19   | 1.00         | 1.19  | 1.00 | 1.00  | 0.19   | 1.00  | 1.19   | 1.19 |      |      |
|          | 20         | 1.06         | 1.00 | 0.03  | 1.00  | 0.92 | 0.92  | 0.16 | 1.00 | 0.05  | 1.00  | 0.94         | 0.94  | 0.17 | 1.00 | 0.09   | 1.00  | 1.04 | 0.17  | 1.00 | 0.09   | 1.00         | 1.04  | 1.00 | 1.00  | 0.09   | 1.00  | 1.04   | 1.04 |      |      |
|          | 30         | 1.06         | 1.00 | 0.02  | 1.00  | 0.84 | 0.84  | 0.16 | 1.00 | 0.03  | 1.00  | 0.86         | 0.86  | 0.17 | 1.00 | 0.06   | 1.00  | 1.04 | 0.17  | 1.00 | 0.06   | 1.00         | 1.04  | 1.00 | 1.00  | 0.06   | 1.00  | 1.04   | 1.04 |      |      |
|          | 0          | 0.00         | 0.00 | ∞     | 2.12  | 3.30 | 3.35  | 0.00 | 0.00 | ∞     | 3.23  | 4.17         | 4.47  | 0.00 | 0.01 | ∞      | 8.60  | 6.57 | 8.04  | 0.00 | 0.01   | ∞            | 8.60  | 6.57 | 8.04  | 0.00   | 0.01  | ∞      | 8.60 | 8.04 |      |
| 0.1      | 0.01       | 0.01         | 1.06 | 1.00  | 1.05  | 1.05 | 0.00  | 0.01 | 1.48 | 1.27  | 1.35  | 1.37         | 0.00  | 0.01 | 4.94 | 3.23   | 3.10  | 3.39 | 0.00  | 0.01 | 4.94   | 3.23         | 3.10  | 3.39 | 0.00  | 0.01   | 4.94  | 3.39   | 3.39 |      |      |
| 0.5      | 0.1        | 0.09         | 0.09 | 0.88  | 0.95  | 0.95 | 0.01  | 0.05 | 0.90 | 0.93  | 0.96  | 0.96         | 0.01  | 0.03 | 1.21 | 1.15   | 1.22  | 1.23 | 0.01  | 0.03 | 1.21   | 1.15         | 1.22  | 1.23 | 0.01  | 0.03   | 1.21  | 1.23   | 1.23 |      |      |
| 0.5      | 1          | 0.41         | 0.38 | 0.80  | 0.99  | 0.95 | 0.95  | 0.04 | 0.24 | 0.80  | 0.97  | 0.94         | 0.94  | 0.02 | 0.12 | 0.84   | 0.95  | 0.97 | 0.02  | 0.12 | 0.84   | 0.95         | 0.97  | 0.97 | 0.02  | 0.12   | 0.84  | 0.97   | 0.97 |      |      |
|          | 2          | 0.75         | 0.71 | 0.74  | 1.00  | 0.95 | 0.95  | 0.07 | 0.43 | 0.74  | 0.99  | 0.94         | 0.94  | 0.04 | 0.21 | 0.76   | 0.96  | 0.94 | 0.04  | 0.21 | 0.76   | 0.96         | 0.94  | 0.94 | 0.04  | 0.21   | 0.76  | 0.94   | 0.94 |      |      |
|          | 5          | 1.32         | 1.24 | 0.64  | 1.00  | 0.94 | 0.94  | 0.12 | 0.77 | 0.66  | 1.00  | 0.93         | 0.93  | 0.07 | 0.37 | 0.68   | 0.98  | 0.92 | 0.07  | 0.37 | 0.68   | 0.98         | 0.92  | 0.92 | 0.07  | 0.37   | 0.68  | 0.92   | 0.92 |      |      |
|          | 10         | 2.39         | 2.24 | 0.47  | 1.00  | 0.92 | 0.92  | 0.23 | 1.41 | 0.49  | 1.00  | 0.90         | 0.90  | 0.13 | 0.75 | 0.53   | 0.99  | 0.89 | 0.13  | 0.75 | 0.53   | 0.99         | 0.89  | 0.89 | 0.13  | 0.75   | 0.53  | 0.89   | 0.89 |      |      |
|          | 20         | 3.20         | 3.00 | 0.32  | 1.00  | 0.89 | 0.89  | 0.32 | 1.99 | 0.35  | 1.00  | 0.87         | 0.87  | 0.19 | 1.12 | 0.39   | 1.00  | 0.85 | 0.19  | 1.12 | 0.39   | 1.00         | 0.85  | 0.85 | 0.19  | 1.12   | 0.39  | 0.85   | 0.85 |      |      |
|          | 30         | 3.84         | 3.60 | 0.19  | 1.00  | 0.83 | 0.83  | 0.41 | 2.56 | 0.22  | 1.00  | 0.81         | 0.81  | 0.26 | 1.50 | 0.26   | 1.00  | 0.80 | 0.26  | 1.50 | 0.26   | 1.00         | 0.80  | 0.80 | 0.26  | 1.50   | 0.26  | 0.80   | 0.80 |      |      |
|          | 0          | 0.00         | 0.00 | ∞     | 2.23  | 3.40 | 3.47  | 0.00 | 0.00 | ∞     | 3.34  | 4.27         | 4.57  | 0.00 | 0.01 | ∞      | 8.63  | 6.58 | 8.02  | 0.00 | 0.01   | ∞            | 8.63  | 6.58 | 8.02  | 0.00   | 0.01  | ∞      | 8.63 | 8.02 |      |
|          | 0.1        | 0.01         | 0.01 | 1.30  | 1.10  | 1.21 | 1.21  | 0.00 | 0.01 | 2.38  | 1.66  | 1.82         | 1.85  | 0.00 | 0.01 | 10.53  | 4.57  | 4.23 | 4.89  | 0.00 | 0.01   | 10.53        | 4.57  | 4.23 | 4.89  | 0.00   | 0.01  | 10.53  | 4.89 | 4.89 |      |
|          | 0.5        | 0.17         | 0.16 | 0.82  | 0.99  | 0.96 | 0.96  | 0.02 | 0.10 | 0.83  | 0.96  | 0.95         | 0.95  | 0.01 | 0.05 | 0.94   | 0.98  | 0.98 | 1.04  | 0.01 | 0.05   | 0.94         | 0.98  | 0.98 | 1.04  | 0.01   | 0.05  | 0.94   | 1.04 | 1.04 |      |
|          | 0.8        | 1            | 0.33 | 0.31  | 0.79  | 1.00 | 0.96  | 0.96 | 0.03 | 0.19  | 0.79  | 0.99         | 0.95  | 0.95 | 0.02 | 0.10   | 0.84  | 0.97 | 0.98  | 0.02 | 0.10   | 0.84         | 0.97  | 0.98 | 0.98  | 0.02   | 0.10  | 0.84   | 0.98 | 0.98 |      |
| 2        |            | 0.62         | 0.58 | 0.74  | 1.00  | 0.96 | 0.96  | 0.06 | 0.35 | 0.74  | 1.00  | 0.95         | 0.95  | 0.03 | 0.17 | 0.77   | 0.98  | 0.96 | 0.03  | 0.17 | 0.77   | 0.98         | 0.96  | 0.96 | 0.03  | 0.17   | 0.77  | 0.96   | 0.96 |      |      |
| 5        |            | 1.31         | 1.23 | 0.63  | 1.00  | 0.95 | 0.95  | 0.12 | 0.74 | 0.64  | 1.00  | 0.94         | 0.94  | 0.07 | 0.38 | 0.66   | 0.99  | 0.93 | 0.07  | 0.38 | 0.66   | 0.99         | 0.93  | 0.93 | 0.07  | 0.38   | 0.66  | 0.93   | 0.93 |      |      |
| 10       |            | 2.07         | 1.94 | 0.50  | 1.00  | 0.94 | 0.94  | 0.20 | 1.22 | 0.53  | 1.00  | 0.92         | 0.92  | 0.11 | 0.64 | 0.56   | 1.00  | 0.91 | 0.11  | 0.64 | 0.56   | 1.00         | 0.91  | 0.91 | 0.11  | 0.64   | 0.56  | 0.91   | 0.91 |      |      |
| 20       |            | 2.95         | 2.77 | 0.36  | 1.00  | 0.91 | 0.91  | 0.30 | 1.86 | 0.39  | 1.00  | 0.89         | 0.89  | 0.17 | 1.00 | 0.43   | 1.00  | 0.88 | 0.17  | 1.00 | 0.43   | 1.00         | 0.88  | 0.88 | 0.17  | 1.00   | 0.43  | 0.88   | 0.88 |      |      |
| 30       |            | 3.44         | 3.23 | 0.28  | 1.00  | 0.88 | 0.88  | 0.35 | 2.17 | 0.31  | 1.00  | 0.86         | 0.86  | 0.21 | 1.20 | 0.36   | 1.00  | 0.85 | 0.21  | 1.20 | 0.36   | 1.00         | 0.85  | 0.85 | 0.21  | 1.20   | 0.36  | 0.85   | 0.85 |      |      |
| 0        |            | 0.00         | 0.00 | ∞     | 2.26  | 3.41 | 3.50  | 0.00 | 0.00 | ∞     | 3.32  | 4.26         | 4.56  | 0.00 | 0.01 | ∞      | 8.65  | 6.60 | 8.04  | 0.00 | 0.01   | ∞            | 8.65  | 6.60 | 8.04  | 0.00   | 0.01  | ∞      | 8.65 | 8.04 |      |
| 0.1      |            | 0.00         | 0.00 | 1.68  | 1.21  | 1.40 | 1.42  | 0.00 | 0.00 | 3.71  | 2.01  | 2.27         | 2.33  | 0.00 | 0.01 | 19.48  | 5.43  | 4.96 | 5.93  | 0.00 | 0.01   | 19.48        | 5.43  | 4.96 | 5.93  | 0.00   | 0.01  | 19.48  | 5.93 | 5.93 |      |
| 0.5      |            | 0.09         | 0.08 | 0.83  | 0.98  | 0.96 | 0.96  | 0.01 | 0.05 | 0.85  | 0.95  | 0.97         | 0.97  | 0.01 | 0.03 | 1.16   | 1.06  | 1.16 | 1.16  | 0.01 | 0.03   | 1.16         | 1.06  | 1.16 | 1.16  | 0.01   | 0.03  | 1.16   | 1.16 | 1.16 |      |
| 0.9      |            | 1            | 0.17 | 0.16  | 0.81  | 1.00 | 0.97  | 0.97 | 0.02 | 0.10  | 0.81  | 0.99         | 0.96  | 0.96 | 0.01 | 0.05   | 0.93  | 0.99 | 1.05  | 0.01 | 0.05   | 0.93         | 0.99  | 1.05 | 1.05  | 0.01   | 0.05  | 0.93   | 1.05 | 1.05 |      |
|          | 2          | 0.33         | 0.31 | 0.78  | 1.00  | 0.97 | 0.97  | 0.03 | 0.18 | 0.78  | 1.00  | 0.96         | 0.96  | 0.02 | 0.09 | 0.83   | 0.99  | 1.00 | 0.02  | 0.09 | 0.83   | 0.99         | 1.00  | 1.00 | 0.02  | 0.09   | 0.83  | 1.00   | 1.00 |      |      |
|          | 5          | 0.75         | 0.70 | 0.72  | 1.00  | 0.97 | 0.97  | 0.07 | 0.42 | 0.71  | 1.00  | 0.96         | 0.96  | 0.04 | 0.21 | 0.73   | 0.99  | 0.96 | 0.04  | 0.21 | 0.73   | 0.99         | 0.96  | 0.96 | 0.04  | 0.21   | 0.73  | 0.96   | 0.96 |      |      |
|          | 10         | 1.29         | 1.21 | 0.63  | 1.00  | 0.96 | 0.96  | 0.12 | 0.74 | 0.64  | 1.00  | 0.95         | 0.95  | 0.06 | 0.38 | 0.66   | 1.00  | 0.94 | 0.06  | 0.38 | 0.66   | 1.00         | 0.94  | 0.94 | 0.06  | 0.38   | 0.66  | 0.94   | 0.94 |      |      |
|          | 20         | 2.08         | 1.95 | 0.51  | 1.00  | 0.94 | 0.94  | 0.20 | 1.26 | 0.53  | 1.00  | 0.93         | 0.93  | 0.11 | 0.65 | 0.56   | 1.00  | 0.92 | 0.11  | 0.65 | 0.56   | 1.00         | 0.92  | 0.92 | 0.11  | 0.65   | 0.56  | 0.92   | 0.92 |      |      |
|          | 30         | 2.62         | 2.47 | 0.42  | 1.00  | 0.93 | 0.93  | 0.26 | 1.59 | 0.45  | 1.00  | 0.91         | 0.91  | 0.14 | 0.82 | 0.49   | 1.00  | 0.92 | 0.14  | 0.82 | 0.49   | 1.00         | 0.92  | 0.92 | 0.14  | 0.82   | 0.49  | 0.92   | 0.92 |      |      |
|          | 0          | 0.00         | 0.00 | ∞     | 2.07  | 3.23 | 3.30  | 0.00 | 0.00 | ∞     | 3.10  | 4.15         | 4.45  | 0.00 | 0.01 | ∞      | 8.57  | 6.70 | 8.07  | 0.00 | 0.01   | ∞            | 8.57  | 6.70 | 8.07  | 0.00   | 0.01  | ∞      | 8.57 | 8.07 |      |
|          | 0.1        | 0.00         | 0.00 | 7.11  | 1.67  | 2.38 | 2.42  | 0.00 | 0.00 | 25.27 | 2.83  | 3.59         | 3.73  | 0.00 | 0.01 | 176.85 | 6.99  | 6.13 | 7.66  | 0.00 | 0.01   | 176.85       | 6.99  | 6.13 | 7.66  | 0.00   | 0.01  | 176.85 | 7.66 | 7.66 |      |
|          | 0.5        | 0.01         | 0.01 | 1.45  | 1.05  | 1.26 | 1.27  | 0.00 | 0.00 | 3.00  | 1.57  | 1.96         | 1.98  | 0.00 | 0.01 | 17.95  | 4.49  | 4.16 | 4.56  | 0.00 | 0.01   | 17.95        | 4.49  | 4.16 | 4.56  | 0.00   | 0.01  | 17.95  | 4.56 | 4.56 |      |
|          | 0.99       | 1            | 0.02 | 0.02  | 0.88  | 1.00 | 1.00  | 1.00 | 0.00 | 0.01  | 1.02  | 1.00         | 1.07  | 1.07 | 0.00 | 0.01   | 2.34  | 1.69 | 2.23  | 2.66 | 0.00   | 0.01         | 2.34  | 1.69 | 2.23  | 2.66   | 0.00  | 0.01   | 2.34 | 2.66 | 2.66 |
| 2        |            | 0.04         | 0.03 | 0.85  | 1.00  | 0.99 | 0.99  | 0.01 | 0.05 | 0.92  | 1.00  | 1.02         | 1.02  | 0.00 | 0.02 | 1.61   | 1.08  | 1.36 | 1.66  | 0.01 | 0.02   | 1.61         | 1.08  | 1.36 | 1.66  | 0.01   | 0.02  | 1.61   | 1.66 | 1.66 |      |
| 5        |            | 0.09         | 0.08 | 0.82  | 1.00  | 0.99 | 0.99  | 0.01 | 0.05 | 0.84  | 1.00  | 1.00         | 1.00  | 0.01 | 0.03 | 1.04   | 1.00  | 1.10 | 1.36  | 0.01 | 0.03   | 1.04         | 1.00  | 1.10 | 1.36  | 0.01   | 0.03  | 1.04   | 1.36 | 1.36 |      |
| 10       |            | 0.17         | 0.16 | 0.80  | 1.00  | 0.99 | 0.99  | 0.02 | 0.09 | 0.81  | 1.00  | 0.99         | 0.99  | 0.01 | 0.05 | 0.90   | 1.00  | 1.04 | 1.36  | 0.02 | 0.09   | 0.90         | 1.00  | 1.04 | 1.36  | 0.02   | 0.09  | 0.90   | 1.36 | 1.36 |      |
| 20       |            | 0.32         | 0.30 | 0.78  | 1.00  | 0.98 | 0.98  | 0.03 | 0.18 | 0.78  | 1.00  | 0.98         | 0.98  | 0.02 | 0.09 | 0.81   | 1.00  | 1.04 | 1.36  | 0.02 | 0.09   | 0.81         | 1.00  | 1.04 | 1.36  | 0.02   | 0.09  | 0.81   | 1.36 | 1.36 |      |
| 30       |            | 0.47         | 0.45 | 0.75  |       |      |       |      |      |       |       |              |       |      |      |        |       |      |       |      |        |              |       |      |       |        |       |        |      |      |      |



Table S7: The relative efficiencies for the proposed estimators in case of  $n = 50$ ,  $p = 30$ , and  $\alpha = 0.05$ .

| $\rho^2$ | $\Delta^2$ | No Outliers |      |        |       |      |       |      |      |         |       | 10% Outliers |       |      |      |          |       |      |       |      |      | 20% Outliers |       |      |       |       |  |  |  |  |  |
|----------|------------|-------------|------|--------|-------|------|-------|------|------|---------|-------|--------------|-------|------|------|----------|-------|------|-------|------|------|--------------|-------|------|-------|-------|--|--|--|--|--|
|          |            | OLS         | M    | RRME   | PTRME | SRME | RPRME | OLS  | M    | RRME    | PTRME | SRME         | PRRME | OLS  | M    | RRME     | PTRME | SRME | PRRME | OLS  | M    | RRME         | PTRME | SRME | PRRME |       |  |  |  |  |  |
| 0        | 0          | 1.13        | 1.00 | ∞      | 1.08  | 2.72 | 2.73  | 0.37 | 1.00 | ∞       | 2.31  | 7.31         | 0.58  | 1.00 | ∞    | 5.86     | ∞     | 8.53 | 18.09 | 0.58 | 1.00 | ∞            | 5.86  | ∞    | 8.53  | 18.09 |  |  |  |  |  |
|          | 0.01       | 1.14        | 1.00 | 416.44 | 1.07  | 2.67 | 2.65  | 0.37 | 1.00 | 1498.09 | 2.22  | 6.94         | 6.95  | 0.57 | 1.00 | 4361.56  | 6.95  | 8.95 | 17.13 | 0.57 | 1.00 | 4361.56      | 6.95  | 8.95 | 17.13 |       |  |  |  |  |  |
|          | 0.1        | 1.14        | 1.00 | 41.99  | 1.04  | 2.45 | 2.45  | 0.37 | 1.00 | 149.03  | 2.02  | 5.53         | 6.27  | 0.57 | 1.00 | 454.54   | 5.13  | 8.88 | 15.32 | 0.57 | 1.00 | 454.54       | 5.13  | 8.88 | 15.32 |       |  |  |  |  |  |
|          | 0.5        | 1.14        | 1.00 | 8.24   | 1.00  | 1.94 | 1.94  | 0.37 | 1.00 | 29.91   | 1.52  | 4.08         | 4.18  | 0.57 | 1.00 | 87.47    | 3.00  | 7.98 | 8.99  | 0.57 | 1.00 | 87.47        | 3.00  | 7.98 | 8.99  |       |  |  |  |  |  |
|          | 1          | 1.13        | 1.00 | 4.12   | 1.00  | 1.69 | 1.69  | 0.37 | 1.00 | 15.13   | 1.30  | 3.31         | 3.32  | 0.57 | 1.00 | 43.44    | 2.30  | 6.50 | 6.67  | 0.57 | 1.00 | 43.44        | 2.30  | 6.50 | 6.67  |       |  |  |  |  |  |
| 0.5      | 2          | 1.14        | 1.00 | 2.08   | 1.00  | 1.50 | 1.50  | 0.38 | 1.00 | 7.74    | 1.16  | 2.65         | 2.65  | 0.58 | 1.00 | 22.35    | 1.74  | 4.90 | 4.91  | 0.58 | 1.00 | 22.35        | 1.74  | 4.90 | 4.91  |       |  |  |  |  |  |
|          | 5          | 1.15        | 1.00 | 0.83   | 1.00  | 1.34 | 1.34  | 0.38 | 1.00 | 3.13    | 0.82  | 2.11         | 2.11  | 0.57 | 1.00 | 8.62     | 2.11  | 3.41 | 3.41  | 0.57 | 1.00 | 8.62         | 2.11  | 3.41 | 3.41  |       |  |  |  |  |  |
|          | 10         | 1.14        | 1.00 | 0.42   | 1.00  | 1.25 | 1.25  | 0.37 | 1.00 | 1.48    | 1.01  | 1.82         | 1.82  | 0.58 | 1.00 | 4.44     | 1.11  | 2.82 | 2.82  | 0.58 | 1.00 | 4.44         | 1.11  | 2.82 | 2.82  |       |  |  |  |  |  |
|          | 20         | 1.13        | 1.00 | 0.21   | 1.00  | 1.18 | 1.18  | 0.38 | 1.00 | 0.77    | 1.00  | 1.63         | 1.63  | 0.58 | 1.00 | 2.18     | 1.04  | 2.35 | 2.35  | 0.58 | 1.00 | 2.18         | 1.04  | 2.35 | 2.35  |       |  |  |  |  |  |
|          | 30         | 1.14        | 1.00 | 0.14   | 1.00  | 1.12 | 1.12  | 0.37 | 1.00 | 0.50    | 1.00  | 1.52         | 1.52  | 0.59 | 1.00 | 1.52     | 1.02  | 2.16 | 2.16  | 0.59 | 1.00 | 1.52         | 1.02  | 2.16 | 2.16  |       |  |  |  |  |  |
| 0.8      | 0          | 0.01        | 0.01 | ∞      | 1.03  | 2.38 | 2.36  | 0.01 | 0.04 | ∞       | 2.20  | 6.45         | 0.03  | 0.06 | Inf  | 4.02     | ∞     | 8.23 | 13.28 | 0.03 | 0.06 | Inf          | 4.02  | 8.23 | 13.28 |       |  |  |  |  |  |
|          | 0.01       | 0.01        | 0.01 | 8.89   | 1.03  | 2.08 | 2.08  | 0.01 | 0.03 | 103.28  | 2.39  | 6.40         | 7.13  | 0.03 | 0.06 | 495.54   | 7.13  | 8.46 | 12.29 | 0.03 | 0.06 | 495.54       | 7.13  | 8.46 | 12.29 |       |  |  |  |  |  |
|          | 0.1        | 0.02        | 0.02 | 1.59   | 1.00  | 1.30 | 1.30  | 0.01 | 0.04 | 11.57   | 1.73  | 4.06         | 4.42  | 0.03 | 0.06 | 52.86    | 3.34  | 7.24 | 9.60  | 0.03 | 0.06 | 52.86        | 3.34  | 7.24 | 9.60  |       |  |  |  |  |  |
|          | 0.5        | 0.07        | 0.06 | 0.95   | 1.00  | 1.03 | 1.03  | 0.02 | 0.05 | 2.83    | 1.32  | 2.17         | 2.19  | 0.03 | 0.06 | 10.40    | 2.22  | 4.66 | 4.90  | 0.03 | 0.06 | 10.40        | 2.22  | 4.66 | 4.90  |       |  |  |  |  |  |
|          | 1          | 0.12        | 0.10 | 0.85   | 1.00  | 0.99 | 0.99  | 0.02 | 0.06 | 1.81    | 1.14  | 1.63         | 1.63  | 0.04 | 0.06 | 5.56     | 1.68  | 3.31 | 3.35  | 0.04 | 0.06 | 5.56         | 1.68  | 3.31 | 3.35  |       |  |  |  |  |  |
| 0.9      | 2          | 0.22        | 0.19 | 0.78   | 1.00  | 0.97 | 0.97  | 0.03 | 0.08 | 1.28    | 1.07  | 1.32         | 1.32  | 0.04 | 0.07 | 3.27     | 1.35  | 2.40 | 2.40  | 0.04 | 0.07 | 3.27         | 1.35  | 2.40 | 2.40  |       |  |  |  |  |  |
|          | 5          | 0.48        | 0.42 | 0.69   | 1.00  | 0.95 | 0.95  | 0.05 | 0.14 | 0.89    | 1.01  | 1.08         | 1.08  | 0.05 | 0.09 | 1.58     | 1.10  | 1.56 | 1.56  | 0.05 | 0.09 | 1.58         | 1.10  | 1.56 | 1.56  |       |  |  |  |  |  |
|          | 10         | 0.82        | 0.72 | 0.59   | 1.00  | 0.94 | 0.94  | 0.09 | 0.24 | 0.70    | 1.00  | 0.98         | 0.98  | 0.07 | 0.13 | 1.13     | 1.02  | 1.28 | 1.28  | 0.07 | 0.13 | 1.13         | 1.02  | 1.28 | 1.28  |       |  |  |  |  |  |
|          | 20         | 1.29        | 1.15 | 0.47   | 1.00  | 0.92 | 0.92  | 0.14 | 0.37 | 0.57    | 1.00  | 0.93         | 0.93  | 0.11 | 0.18 | 0.80     | 1.00  | 1.07 | 1.07  | 0.11 | 0.18 | 0.80         | 1.00  | 1.07 | 1.07  |       |  |  |  |  |  |
|          | 30         | 1.61        | 1.42 | 0.39   | 1.00  | 0.90 | 0.90  | 0.18 | 0.48 | 0.49    | 1.00  | 0.90         | 0.90  | 0.13 | 0.23 | 0.69     | 1.00  | 1.01 | 1.01  | 0.13 | 0.23 | 0.69         | 1.00  | 1.01 | 1.01  |       |  |  |  |  |  |
| 0.99     | 0          | 0.01        | 0.01 | ∞      | 1.02  | 2.36 | 2.36  | 0.01 | 0.04 | ∞       | 2.19  | 6.37         | 0.03  | 0.06 | ∞    | 4.13     | ∞     | 8.35 | 13.46 | 0.03 | 0.06 | ∞            | 4.13  | 8.35 | 13.46 |       |  |  |  |  |  |
|          | 0.01       | 0.01        | 0.01 | 20.26  | 1.03  | 2.25 | 2.25  | 0.01 | 0.03 | 257.35  | 2.31  | 6.59         | 7.34  | 0.03 | 0.06 | 1214.13  | 4.19  | 8.77 | 12.89 | 0.03 | 0.06 | 1214.13      | 4.19  | 8.77 | 12.89 |       |  |  |  |  |  |
|          | 0.1        | 0.02        | 0.01 | 2.69   | 1.00  | 1.54 | 1.54  | 0.01 | 0.04 | 27.01   | 1.79  | 4.77         | 5.25  | 0.03 | 0.06 | 129.16   | 3.33  | 7.72 | 10.29 | 0.03 | 0.06 | 129.16       | 3.33  | 7.72 | 10.29 |       |  |  |  |  |  |
|          | 0.5        | 0.03        | 0.03 | 1.16   | 1.00  | 1.12 | 1.12  | 0.02 | 0.04 | 2.92    | 1.42  | 2.92         | 2.92  | 0.03 | 0.06 | 24.93    | 2.24  | 5.65 | 5.92  | 0.03 | 0.06 | 24.93        | 2.24  | 5.65 | 5.92  |       |  |  |  |  |  |
|          | 1          | 0.05        | 0.05 | 0.98   | 1.00  | 1.04 | 1.04  | 0.02 | 0.05 | 3.47    | 1.18  | 2.16         | 2.16  | 0.03 | 0.06 | 12.83    | 1.74  | 4.22 | 4.27  | 0.03 | 0.06 | 12.83        | 1.74  | 4.22 | 4.27  |       |  |  |  |  |  |
| 0.99     | 2          | 0.10        | 0.09 | 0.87   | 1.00  | 1.00 | 1.00  | 0.02 | 0.06 | 2.14    | 1.11  | 1.67         | 1.67  | 0.04 | 0.06 | 7.10     | 1.43  | 3.14 | 3.15  | 0.04 | 0.06 | 7.10         | 1.43  | 3.14 | 3.15  |       |  |  |  |  |  |
|          | 5          | 0.22        | 0.19 | 0.78   | 1.00  | 0.98 | 0.98  | 0.03 | 0.08 | 1.26    | 1.03  | 1.27         | 1.27  | 0.04 | 0.07 | 2.99     | 1.16  | 2.08 | 2.08  | 0.04 | 0.07 | 2.99         | 1.16  | 2.08 | 2.08  |       |  |  |  |  |  |
|          | 10         | 0.40        | 0.35 | 0.71   | 1.00  | 0.97 | 0.97  | 0.05 | 0.13 | 0.92    | 1.01  | 1.09         | 1.09  | 0.05 | 0.09 | 1.94     | 1.06  | 1.67 | 1.67  | 0.05 | 0.09 | 1.94         | 1.06  | 1.67 | 1.67  |       |  |  |  |  |  |
|          | 20         | 0.69        | 0.61 | 0.62   | 1.00  | 0.95 | 0.95  | 0.08 | 0.20 | 0.75    | 1.00  | 1.02         | 1.02  | 0.07 | 0.11 | 1.24     | 1.02  | 1.32 | 1.32  | 0.07 | 0.11 | 1.24         | 1.02  | 1.32 | 1.32  |       |  |  |  |  |  |
|          | 30         | 0.93        | 0.82 | 0.56   | 1.00  | 0.94 | 0.94  | 0.10 | 0.27 | 0.67    | 1.00  | 0.98         | 0.98  | 0.08 | 0.14 | 1.02     | 1.02  | 1.21 | 1.21  | 0.08 | 0.14 | 1.02         | 1.02  | 1.21 | 1.21  |       |  |  |  |  |  |
| 0.99     | 0          | 0.01        | 0.01 | ∞      | 1.02  | 2.36 | 2.36  | 0.01 | 0.04 | ∞       | 2.17  | 6.31         | 7.08  | 0.03 | 0.06 | ∞        | 4.15  | 8.34 | 13.49 | 0.03 | 0.06 | ∞            | 4.15  | 8.34 | 13.49 |       |  |  |  |  |  |
|          | 0.01       | 0.01        | 0.01 | 39.73  | 1.03  | 2.32 | 2.32  | 0.01 | 0.03 | 509.48  | 2.24  | 6.67         | 7.43  | 0.03 | 0.06 | 2412.95  | 4.17  | 8.82 | 13.00 | 0.03 | 0.06 | 2412.95      | 4.17  | 8.82 | 13.00 |       |  |  |  |  |  |
|          | 0.1        | 0.01        | 0.01 | 4.55   | 1.01  | 1.75 | 1.75  | 0.01 | 0.04 | 53.23   | 1.82  | 5.06         | 5.58  | 0.03 | 0.06 | 256.42   | 3.36  | 7.93 | 10.58 | 0.03 | 0.06 | 256.42       | 3.36  | 7.93 | 10.58 |       |  |  |  |  |  |
|          | 0.5        | 0.02        | 0.02 | 1.56   | 1.00  | 1.24 | 1.24  | 0.01 | 0.04 | 11.09   | 1.44  | 3.41         | 3.41  | 0.03 | 0.06 | 49.02    | 2.26  | 6.12 | 6.41  | 0.03 | 0.06 | 49.02        | 2.26  | 6.12 | 6.41  |       |  |  |  |  |  |
|          | 1          | 0.03        | 0.03 | 1.17   | 1.00  | 1.10 | 1.10  | 0.02 | 0.04 | 6.22    | 1.20  | 2.56         | 2.56  | 0.03 | 0.06 | 24.71    | 1.79  | 4.72 | 4.77  | 0.03 | 0.06 | 24.71        | 1.79  | 4.72 | 4.77  |       |  |  |  |  |  |
| 0.99     | 2          | 0.05        | 0.05 | 0.98   | 1.00  | 1.04 | 1.04  | 0.02 | 0.05 | 3.56    | 1.12  | 2.00         | 2.00  | 0.04 | 0.06 | 13.43    | 1.46  | 3.61 | 3.62  | 0.04 | 0.06 | 13.43        | 1.46  | 3.61 | 3.62  |       |  |  |  |  |  |
|          | 5          | 0.12        | 0.10 | 0.84   | 1.00  | 1.00 | 1.00  | 0.02 | 0.06 | 1.83    | 1.04  | 1.48         | 1.48  | 0.04 | 0.06 | 5.36     | 1.21  | 2.51 | 2.51  | 0.04 | 0.06 | 5.36         | 1.21  | 2.51 | 2.51  |       |  |  |  |  |  |
|          | 10         | 0.22        | 0.19 | 0.78   | 1.00  | 0.98 | 0.98  | 0.03 | 0.08 | 1.20    | 1.01  | 1.22         | 1.22  | 0.04 | 0.07 | 3.24     | 1.08  | 2.05 | 2.05  | 0.04 | 0.07 | 3.24         | 1.08  | 2.05 | 2.05  |       |  |  |  |  |  |
|          | 20         | 0.40        | 0.35 | 0.71   | 1.00  | 0.97 | 0.97  | 0.05 | 0.12 | 0.93    | 1.00  | 1.10         | 1.10  | 0.05 | 0.09 | 1.87     | 1.04  | 1.59 | 1.59  | 0.05 | 0.09 | 1.87         | 1.04  | 1.59 | 1.59  |       |  |  |  |  |  |
|          | 30         | 0.55        | 0.48 | 0.66   | 1.00  | 0.96 | 0.96  | 0.06 | 0.17 | 0.83    | 1.00  | 1.05         | 1.05  | 0.06 | 0.10 | 1.48     | 1.03  | 1.46 | 1.46  | 0.06 | 0.10 | 1.48         | 1.03  | 1.46 | 1.46  |       |  |  |  |  |  |
| 0.99     | 0          | 0.01        | 0.01 | ∞      | 1.02  | 2.35 | 2.35  | 0.01 | 0.04 | ∞       | 2.25  | 6.38         | 7.21  | 0.03 | 0.06 | ∞        | 4.15  | 8.32 | 13.32 | 0.03 | 0.06 | ∞            | 4.15  | 8.32 | 13.32 |       |  |  |  |  |  |
|          | 0.01       | 0.01        | 0.01 | 387.31 | 1.05  | 2.39 | 2.39  | 0.01 | 0.03 | 5095.79 | 2.15  | 6.60         | 7.36  | 0.03 | 0.06 | 23968.83 | 4.14  | 8.87 | 13.12 | 0.03 | 0.06 | 23968.83     | 4.14  | 8.87 | 13.12 |       |  |  |  |  |  |
|          | 0.1        | 0.01        | 0.01 | 38.76  | 1.01  | 2.05 | 2.05  | 0.01 | 0.04 | 522.13  | 1.91  | 5.40         | 5.95  | 0.03 | 0.06 | 2554.61  | 3.39  | 8.14 | 10.85 | 0.03 | 0.06 | 2554.61      | 3.39  | 8.14 | 10.85 |       |  |  |  |  |  |
|          | 0.5        | 0.01        | 0.01 | 7.92   | 1.00  | 1.63 | 1.63  | 0.01 | 0.04 | 104.78  | 1.48  | 4.09         | 4.12  | 0.03 | 0.06 | 484.42   | 2.25  | 6.59 | 6.88  | 0.03 | 0.06 | 484.42       | 2.25  | 6.59 | 6.88  |       |  |  |  |  |  |
|          | 1          | 0.01        | 0.01 | 4.61   | 1.00  | 1.44 | 1.44  | 0.01 | 0.04 | 56.35   | 1.23  | 3.21         | 3.21  | 0.03 | 0.06 | 240.69   | 1.80  | 5.23 | 5.28  | 0.03 | 0.06 | 240.69       | 1.80  | 5.23 | 5.28  |       |  |  |  |  |  |
| 0.99     | 2          | 0.02        | 0.01 | 2.70   | 1.00  | 1.28 | 1.28  | 0.01 | 0.04 | 28.92   | 1.15  | 2.69         | 2.69  | 0.03 | 0.06 | 127.86   | 1.49  | 4.19 | 4.19  | 0.03 | 0.06 | 127.86       | 1.49  | 4.19 | 4.19  |       |  |  |  |  |  |
|          | 5          | 0.02        | 0.02 | 1.53   | 1.00  | 1.14 | 1.14  | 0.01 | 0.04 | 11.91   | 1.07  | 2.19         | 2.19  | 0.03 | 0.06 | 47.07    | 1.25  | 3.32 | 3.32  | 0.03 | 0.06 | 47.07        | 1.25  | 3.32 | 3.32  |       |  |  |  |  |  |
|          | 10         | 0.03        | 0.03 | 1.17   | 1.00  | 1.07 | 1.07  | 0.01 | 0.04 | 5.78    | 1.03  | 1.84         | 1.84  | 0.04 | 0.06 | 26.38    | 1.12  | 2.91 | 2.91  | 0.04 | 0.06 | 26.38        | 1.12  | 2.91 | 2.91  |       |  |  |  |  |  |
|          | 20         | 0.05        | 0.05 | 0.97   | 1.00  | 1.03 | 1.03  | 0.02 | 0.04 | 3.35    | 1.00  | 1.63         | 1.63  | 0.03 | 0.06 | 12.88    | 1.07  | 2.48 | 2.48  | 0.03 | 0.06 | 12.88        | 1.07  | 2.48 | 2.48  |       |  |  |  |  |  |
|          | 30         | 0.08        | 0.07 | 0.91   | 1.00  | 1.01 | 1.01  | 0.02 | 0.05 | 2.58    | 1.01  | 1.50         | 1.50  | 0.04 | 0.06 | 1.91     | 1.05  | 2.40 | 2.40  | 0.04 | 0.06 | 1.91         | 1.05  | 2.40 | 2.40  |       |  |  |  |  |  |

Table S8: Summary statistics for the V02 data set

| Variables | Min    | Q1    | Median | Mean  | Q3    | Max   |
|-----------|--------|-------|--------|-------|-------|-------|
| AGE       | 34.00  | 45.00 | 52.00  | 51.76 | 58.00 | 73.00 |
| MHR       | 94.0   | 140.0 | 162.0  | 158.3 | 178.0 | 200.0 |
| DUR       | 36.0   | 289.0 | 478.0  | 444.8 | 599.0 | 798.0 |
| MXS       | 105.0  | 150.0 | 175.0  | 175.6 | 196.0 | 290.0 |
| MXD       | 30.0   | 70.0  | 80.00  | 78.6  | 90.0  | 152.0 |
| FAI       | -22.00 | -1.00 | 12.00  | 17.99 | 37.00 | 71.00 |
| V02       | 4.70   | 20.10 | 30.60  | 29.17 | 37.30 | 59.70 |

Table S9: VIF values for the V02 data set

| Predictors | AGE    | MHR    | DUR     | MXS    | MXD    | FAI     |
|------------|--------|--------|---------|--------|--------|---------|
| VIF        | 2.0709 | 2.4013 | 18.8488 | 1.2082 | 1.2702 | 16.9611 |

The Figure S9 shows the observations 31, 33, 75 may be outliers. The results of apply outlierTest function in the `car` package in R confirm that observations 33 is an outlier.

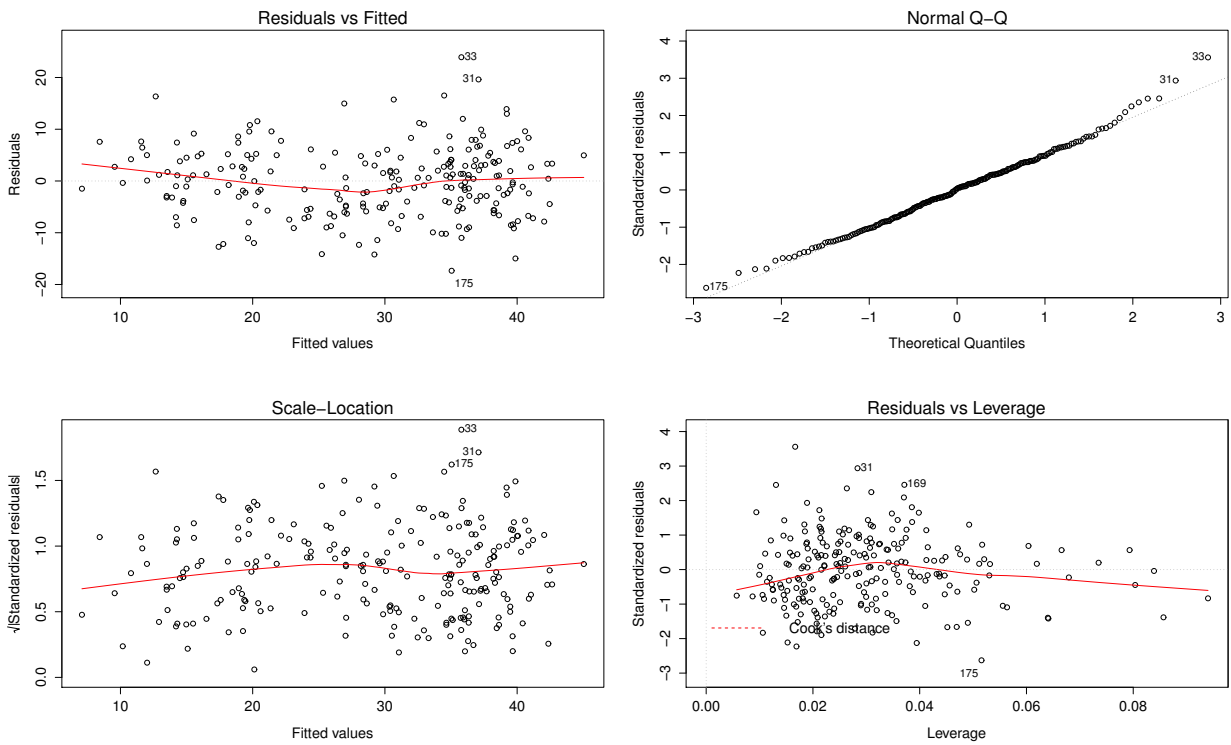

Figure S9: The plots for identifying outliers in V02 dataset

Thus, this dataset suffers the problems of multicollinearity and outliers simultaneously.

## S5.2 Bodyfat Dataset

The summary statistics of all variables is shown in Table S10. The visual correlation matrix for the covariates is shown in Figure S10.

Table S10: Summary statistics for the bodyfat data

| Variables | Min   | Q1    | Median | Mean   | Q3     | Max    |
|-----------|-------|-------|--------|--------|--------|--------|
| DENSITY   | 0.995 | 1.041 | 1.055  | 1.056  | 1.070  | 1.109  |
| AGE       | 22.00 | 35.75 | 43.00  | 44.88  | 54.00  | 81.00  |
| WEIGHT    | 118.5 | 159.0 | 176.5  | 178.9  | 197.0  | 363.1  |
| HEIGHT    | 29.50 | 68.25 | 70.00  | 70.15  | 72.25  | 77.75  |
| NECK      | 31.10 | 36.40 | 38.00  | 37.99  | 39.42  | 51.20  |
| CHEST     | 79.30 | 94.35 | 99.65  | 100.82 | 105.38 | 136.20 |
| ABDOMEN   | 69.40 | 84.58 | 90.95  | 92.56  | 99.33  | 148.10 |
| HIP       | 85.0  | 95.5  | 99.3   | 99.9   | 103.5  | 147.7  |
| THIGH     | 47.20 | 56.00 | 59.00  | 59.41  | 62.35  | 87.30  |
| KNEE      | 33.00 | 36.98 | 38.50  | 38.59  | 39.92  | 49.10  |
| ANKLE     | 19.1  | 22.0  | 22.8   | 23.1   | 24.0   | 33.9   |
| BICEPS    | 24.80 | 30.20 | 32.05  | 32.27  | 34.33  | 45.00  |
| FOREARM   | 21.00 | 27.30 | 28.70  | 28.66  | 30.00  | 34.90  |
| WRIST     | 15.80 | 17.60 | 18.30  | 18.23  | 18.80  | 21.40  |
| SIRI      | 0.00  | 12.47 | 19.20  | 19.15  | 25.30  | 47.50  |

From Figure S10, we may guess the existence of multicollinearity. VIF values are shown in Table S11.

Table S11: VIF values for the body fat data

|            |         |        |         |        |        |         |         |
|------------|---------|--------|---------|--------|--------|---------|---------|
| Predictors | density | age    | weight  | height | neck   | chest   | abdomen |
| VIF        | 3.8182  | 2.2747 | 34.0317 | 1.6778 | 4.3965 | 9.4722  | 18.1199 |
| Predictors | hip     | thigh  | knee    | ankle  | biceps | forearm | wrist   |
| VIF        | 14.9609 | 7.8877 | 4.6123  | 1.9200 | 3.6516 | 2.2370  | 3.5215  |

The values of Table S11 and  $\kappa = 189095237$  shows that there is a strong multicollinearity between independent variables.

The Figure S11 shows the observations 48, 76, 86 and 96 may be outliers. The results of apply outlierTest function in the `car` package in R confirm that observations 48 and 96 are outliers.

Thus, this dataset suffers the problems of multicollinearity and outliers simultaneously.

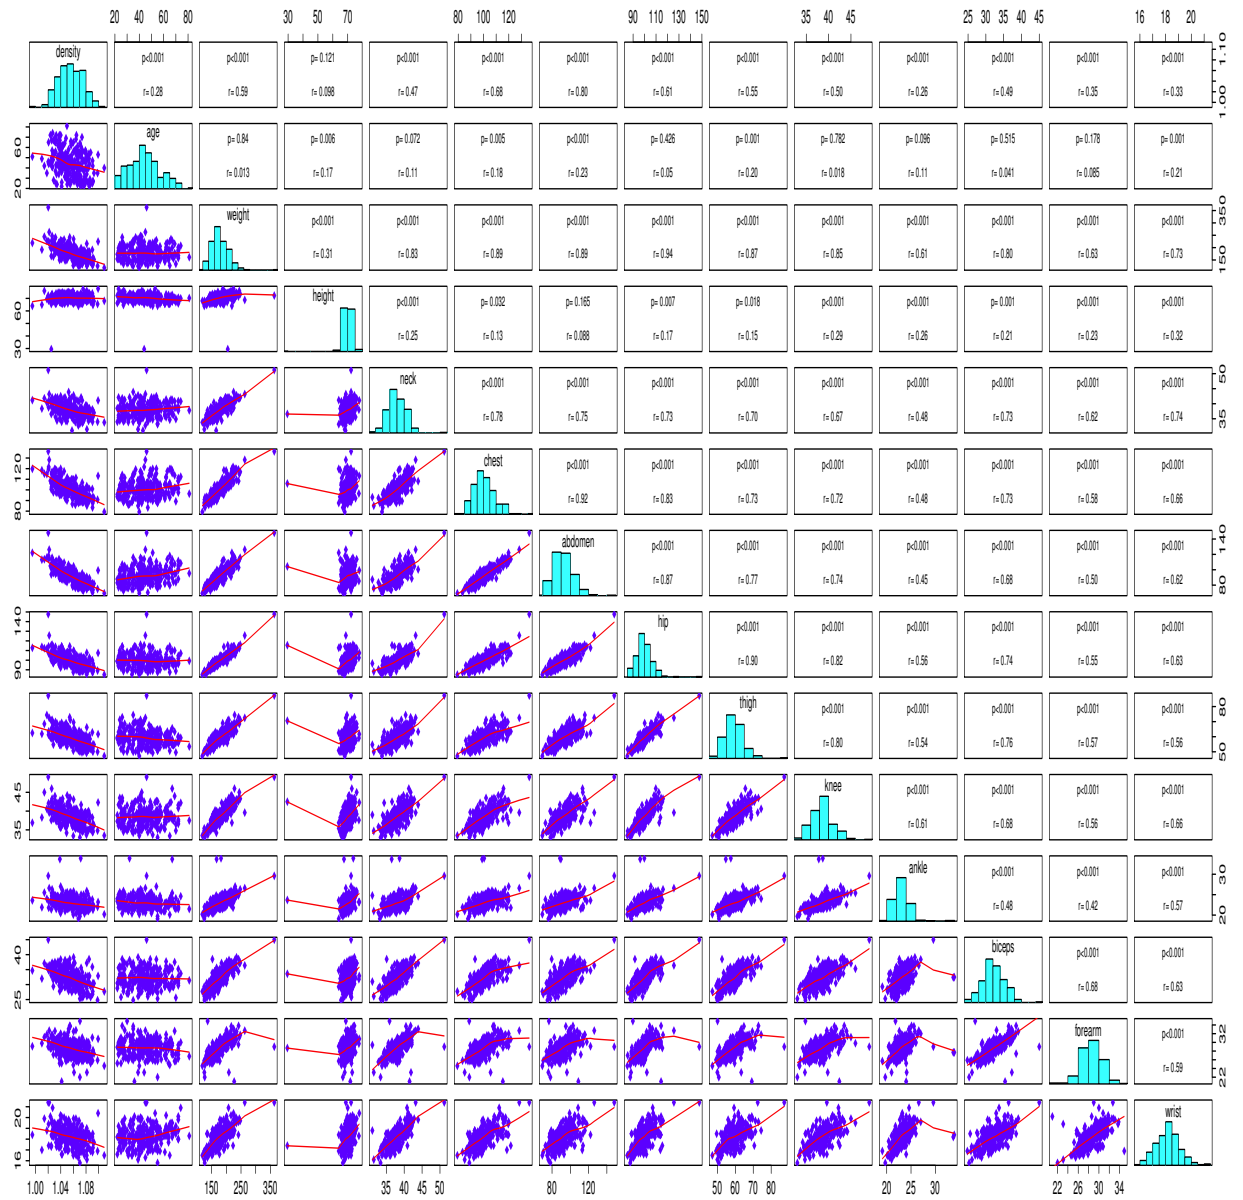

Figure S10: The scatter plot for independent variables of bodyfat datasets
